29 **Abstract**

30

31 Perspectives in conservation are based on a variety of value systems. Such differences in how  
32 people value nature and its components lead to different evaluations of the morality of  
33 conservation goals and approaches, and often underlie disagreements in the formulation and  
34 implementation of environmental management policies. Specifically, whether a conservation  
35 action (e.g. killing feral cats to reduce predation on bird species threatened with extinction) is  
36 viewed as appropriate or not can vary among people with different value systems. Here, we  
37 present a conceptual, mathematical framework intended as a tool to systematically explore and  
38 clarify core value statements in conservation approaches. Its purpose is to highlight how  
39 fundamental differences between these value systems can lead to different prioritizations of  
40 available management options and offer a common ground for discourse. The proposed  
41 equations decompose the question underlying many controversies around management decisions  
42 in conservation: what or who is valued, how, and to what extent? We compare how management  
43 decisions would likely be viewed under three different idealised value systems: ecocentric  
44 conservation, which aims to preserve biodiversity; new conservation, which considers that  
45 biodiversity can only be preserved if it benefits humans; and sentientist conservation, which aims  
46 at minimising suffering for sentient beings. We illustrate the utility of the framework by applying  
47 it to case studies involving invasive alien species, rewilding, and trophy hunting. By making  
48 value systems and their consequences in practice explicit, the framework facilitates debates on  
49 contested conservation issues, and complements philosophical discursive approaches about  
50 moral reasoning. We believe dissecting the core value statements on which conservation  
51 decisions are based will provide an additional tool to understand and address conservation  
52 conflicts.

53

54

55 **Keywords:** anthropocentrism; biocentrism; ecocentrism; environmental ethics; impact; invasive  
56 alien species; moral values; sentientism; speciesism

57

## 58 INTRODUCTION

59

60 The consideration of the moral relationship between people and nature and the consequent  
61 ethical obligations for conservation is relatively recent in Western culture. Environmental ethics  
62 emerged as an academic discipline in the 1970s (Brennan and Lo 2016) and the concepts of  
63 values, duty, and animal welfare, are increasingly appreciated in applied ecology and  
64 conservation (Dubois et al. 2017, Díaz et al. 2018). These concepts are complex, and the  
65 formulation and implementation of environmental management policies is often associated with  
66 conflicts between different groups of stakeholders and between people with different values and  
67 interests, for example for the management of charismatic alien species (Redpath et al. 2013,  
68 Crowley et al. 2017, Jarić et al. 2020). An examination of how value systems could be explicitly  
69 accounted for in conservation decisions could offer opportunities for better identifying conflicts,  
70 potentially helping to resolve them, and overall improve environmental management.

71

72 Value systems consider more or less inclusive communities of moral patients, defined as the  
73 elements with intrinsic or inherent value towards which humans, considered here as the  
74 community of moral agents, are considered to have obligations (in the following, for simplicity,  
75 we refer to the community of moral patients as the moral community; Table 1). Moral  
76 communities can include only humans (anthropocentrism), to further incorporate sentient beings  
77 (sentientism), living beings (biocentrism), and collectives (such as species and ecosystems;  
78 ecocentrism) (Table 1, Figure 1). The definition of moral communities can also be influenced by  
79 additional elements (such as spatial elements in the case of nativism), and, at the assessor level,  
80 by personal experience. These value systems underlie different sets of explicit or implicit  
81 normative postulates, i.e. value statements that make up the basis of an ethic of appropriate  
82 attitudes toward other forms of life, which, in turn, can form the basis of different conservation  
83 approaches (Soulé 1985; Table 1). If the normative postulates of different value systems diverge  
84 (and excluding considerations that moral reasoning, experience, etc., may change one's value  
85 system), conflicts can arise between different groups of stakeholders whose members share  
86 common moral values (Crowley et al. 2017). In particular, conservationists who value  
87 biodiversity *per se* [as defined initially by Soulé (1985), called hereafter 'traditional  
88 conservation' (Table 1)] can be at odds with those who value biodiversity based on human

89 welfare and economic aspects [including ‘new conservation’ (Kareiva and Marvier 2012)], or  
90 with those based on animal welfare [‘conservation welfare’ (Beausoleil et al. 2018), or, to a  
91 certain extent, ‘compassionate conservation’ (Wallach et al. 2018)]. These issues have been  
92 heatedly debated in the literature (Kareiva 2014, Soulé 2014, Doak et al. 2015, Driscoll and  
93 Watson 2019, Hayward et al. 2019).

94  
95 In the following, our aim is to conceptualize and decompose value systems in an explicit, and  
96 potentially (but not necessarily) quantifiable, fashion using a common mathematical framework,  
97 and to explore their repercussions for the perception of conservation management actions by  
98 stakeholders with different value systems. We argue that doing so allows for explicit comparison  
99 between these perceptions to identify sources of potential conflicts. First, we recapitulate four  
100 archetypal value systems in environmental affairs and relate them to different conservation  
101 philosophies. Since identifying commonalities in the perspectives of different parties is key in  
102 conflict management (Redpath et al. 2013), we then introduce a formal framework to  
103 conceptualise these value systems, and examine how it can be applied to clarify different  
104 perspectives. Finally, we discuss opportunities for identifying commonalities between different  
105 value systems that may enable identifying widely acceptable solutions to otherwise polarising  
106 issues.

107  
108

## 109 **VALUE SYSTEMS AND CONSERVATION PRACTICES**

110  
111 Here, we focus on a Western perspective of value systems that have been internationally  
112 considered for environmental policies and the management of nature (Mace 2014). The  
113 archetypes of value systems and of conservation approaches were chosen for their importance in  
114 the past and present literature and their clear differences, to illustrate our framework. We  
115 acknowledge this is a small part of the global diversity of value systems. It would be interesting  
116 to see if our framework could be applied to other contexts, to identify its limitations.

117

118 **From the valuation of humans to that of ecosystems: a spectrum of value systems in**  
119 **conservation.**

120

121 The Western perspective of moral valuation encompasses a diverse set of value systems with  
122 respect to the components of nature that form the moral community. Traditionally, one can  
123 distinguish at least four archetypal value systems: anthropocentrism, sentientism, biocentrism,  
124 and ecocentrism (Rolston 2003, Palmer et al. 2014) (Table 1; Figure 1).

125

126 Anthropocentrism values nature by the benefits it brings to people through ecosystem services,  
127 which encompasses economic, biological, and cultural benefits humans can derive from nature  
128 (Díaz et al. 2018). One justification for anthropocentrism is that humans are (arguably) the only  
129 self-reflective moral beings, and people are both the subject and object of ethics (Rolston 2003),  
130 therefore constituting the moral community. In an anthropocentric system, individuals from non-  
131 human species only have value based on their benefits or disservices for humans (instrumental or  
132 non-instrumental).

133

134 Sentientism considers that humans and all sentient animals value their life, and experience  
135 pleasure, pain, and suffering. All sentient individuals should therefore also be part of the moral  
136 community (i.e. have an intrinsic value). In this view, it is the sentience [e.g. measured through  
137 cognitive ability, (Singer 2009)], rather than species themselves, that has intrinsic value.

138

139 Biocentrism considers that life has intrinsic value. Although different perspectives on why life  
140 has value exist (Taylor 2011), all living organisms are valued equally for being alive, and not  
141 differently based on any other trait.

142

143 Some ecocentric, or holistic, value systems consider that ecological collectives, such as species  
144 or ecosystems, have intrinsic value, independently from the individuals that comprise them.  
145 Species can have different values, i.e. speciesism (Table 1), and these values can be influenced  
146 by a multitude of factors, discussed in more detail below.

147

148 **Subjective elements in the valuation of nature**

149

150 In practice, the separation between anthropocentrism, sentientism, biocentrism, and ecocentrism  
151 is blurry, and values given to different species may vary under the same general approach. For  
152 example, biocentrism can range from complete egalitarianism between organisms, i.e.  
153 universalism (Table 1), to a gradual valuation resembling sentientism. These four value systems  
154 can also interact with other systems that use other criteria than the intrinsic characteristics of  
155 individuals to define the moral community. For example, nativism is a system that values  
156 organisms indigenous to a spatial location or an ecosystem over those that have been  
157 anthropogenically introduced. Nativism can therefore interact with any of the four systems  
158 presented above to alter the value attributed to a species in a given context. Finally, the  
159 attribution of values to individuals from different species can be deeply embedded in the  
160 individual psychologies of the assessor (Palmer et al. 2014, Waytz et al. 2019). Values and  
161 personal interests interact in making and expressing moral judgements (Essl et al. 2017). Thus,  
162 the archetypes of value systems presented above are rarely expressed in a clear and obvious  
163 fashion. Nonetheless, by formalising the archetypes, a framework can be created within which  
164 the consequence of conservation actions explored.

165

166 To account for the different elements that can be combined to create the concept of value, in the  
167 following, we distinguish between ‘intrinsic’, ‘inherent’, and ‘utilitarian’, value (our definitions;  
168 Table 1). Intrinsic value is the value possessed by an individual or collective as defined by one of  
169 the systems above, and is therefore independent of context. Intrinsic value is based on objective  
170 criteria such as cognitive ability. The choice of a criteria may be subjective, but the value is  
171 independent of the assessor once the criteria has been defined. This has been termed “objective  
172 intrinsic value” by others (Sandler 2012). Inherent value is the value of an individual, species or  
173 ecosystem that results from the combination of its intrinsic value and context-specific and  
174 subjective factors (note that other scholars have used ‘inherent’ differently, e.g. (Taylor 1987,  
175 Regan 2004); here it corresponds to what has also been termed “subjective intrinsic value”;  
176 (Sandler 2012)). These factors include charisma (Courchamp et al. 2018, Jarić et al. 2020),  
177 anthropomorphism (Tam et al. 2013; Table 1), organismic complexity (Proença et al. 2008),  
178 neoteny (Stokes 2007; Table 1), cultural importance (Garibaldi and Turner 2004), religion  
179 (Bhagwat et al. 2011), parochialism (Waytz et al. 2019; Table 1), and more generally the  
180 relationship between humans and elements of nature (Chan et al. 2016). For example, dogs and

181 wolves may be considered to have similar cognitive abilities objectively, and therefore a similar  
182 intrinsic value under sentientism, but dogs may have a higher inherent value for some people  
183 because they are in close contact with individuals from this species, i.e. parochialism. Some alien  
184 species that did not have any inherent value prior to their introduction have been incorporated in  
185 local cultures, therefore providing them a novel and higher inherent value such as horses being  
186 linked to a strong local cultural identity in some parts of the USA (Rikoon 2006). Inherent value  
187 can often be considered to be fixed at the time scale of a management action, but can nonetheless  
188 vary over short time scales in some situations (see the example of the Oostvaardersplassen nature  
189 reserve below). Utilitarian value is determined only from an anthropocentric perspective. It is  
190 context-dependent and can change rapidly, for example in the case of commercial exploitation.

191

### 192 **Conservation management derived from value systems.**

193

194 Conservation practices can historically be divided into three main categories, closely related to  
195 specific systems of moral valuation (Mace 2014). At one extreme, a ‘nature for itself’ (Table 1)  
196 view mostly excludes humans from the assessment of the efficacy of conservation management  
197 actions (Figure 2). This ecocentric perspective is the foundation of traditional conservation as  
198 defined by Soulé (1985), and relies on the four following normative postulates: “diversity of  
199 organisms is good,” “ecological complexity is good,” “evolution is good,” and “biotic diversity  
200 has intrinsic value” (Soulé 1985). It historically underlies widely-used conservation tools, like  
201 the IUCN Red List of Threatened Species (IUCN 2019), in which threat categories are defined in  
202 terms of probability of extinction (Mace and Lande 1991) (i.e. a species-level criterion aimed at  
203 preserving biodiversity). Ecocentrism is often not limited to the valuation of species, but can  
204 encompass wider collectives, i.e. assemblages of species and functions, or ecosystems. This  
205 other perspective is captured, for example, by the IUCN Red List of Ecosystems (IUCN-CEM  
206 2016), and it is strongly reflected in international conservation agreements such as the  
207 Convention on Biological Diversity (UNEP CBD 2010). In the following we refer to traditional  
208 conservation as an ecocentric value system where species are intrinsically valuable (nature for  
209 itself; Figure 1) and humans are mostly excluded from management. We acknowledge that this is  
210 an archetypal view of traditional conservation, which is used here simply for illustrative  
211 purposes.



212

213 By contrast the more recent, anthropocentric ‘nature for people’ perspective (Mace 2014) values  
214 species and ecosystems only to the extent that they contribute to the wellbeing of humans (Figure  
215 2). These values encompass ecosystem services that help sustain human life (Bolund and  
216 Hunhammar 1999) or economic assets (Fisher et al. 2008), and can rely on the assessment of  
217 species and ecosystem services in terms of their economic value (Costanza et al. 1997), which  
218 can be considered as the most general form of utilitarian value, and has also been termed  
219 economism (Norton 2000). The ‘nature for people’ perspective can nonetheless incorporate  
220 additional measures linked to human wellbeing, such as poverty alleviation or political  
221 participation. This more holistic measure of impacts on humans is exemplified by ‘new  
222 conservation’, also termed ‘social conservation’ (Miller et al. 2011, Kareiva 2014, Doak et al.  
223 2015) (Table 1; Figure 2). It has been argued that such an anthropocentric perspective will, by  
224 extension, help and even be necessary to maximize the conservation of nature (Kareiva and  
225 Marvier 2012). Although New Conservation was introduced relatively recently (Figure 2), it  
226 follows an older perspective termed the convergence hypothesis, which argues that if human  
227 interests depends on the elements of nature, conservation approaches motivated by  
228 anthropogenic instrumental or non-anthropogenic intrinsic values should be the same (Norton  
229 1986; Table 1). It is important to note that the exact set of normative postulates proposed by the  
230 proponents of new conservation is not clearly defined (Miller et al. 2011), leading to differences  
231 of interpretation and heated debates in recent years (Kareiva and Marvier 2012, Kareiva 2014,  
232 Soulé 2014, Doak et al. 2015).

233

234 More recently, the necessity to account for the interdependence between the health of nature and  
235 human wellbeing [i.e. ‘people and nature’ (Mace 2014); Figure 2] has been advocated in the  
236 United Nations Sustainable Development Goals (Weitz et al. 2018). This approach lies on the  
237 notion of weak anthropocentrism, introduced by the environmental pragmatism movement  
238 (Norton 1984, Katz and Light 2013), in which the value of elements of the environment is not  
239 only utilitarian, but defined by the relationship between humans and nature (Chan et al. 2016),  
240 and therefore is influenced by context and people’s experience (see also the notion of inherent  
241 value described above). Similarly, “nature-based solutions” is an approach endorsed by the  
242 IUCN, which aims at protecting, sustainably managing, and restoring, natural or modified



243 ecosystems, to simultaneously provide human wellbeing and biodiversity benefits (Cohen-  
244 Shacham et al. 2016). The ‘One Health’ approach, endorsed by the Food and Agriculture  
245 Organization, the World Health Organization, and the World Organisation for Animal Health  
246 also acknowledges the interdependence between the state of ecosystems, human health, and  
247 zoonoses (Gibbs 2014). The difference between people and nature and new conservation  
248 approaches therefore lies in the fact that it merges anthropocentric and ecocentric systems, rather  
249 than considering that the latter will be addressed by focusing on the former (see Section “Nature  
250 despite/for/and people” below for details).

251  
252 Finally, although the animal rights movement, based on sentientism, originated in the 19<sup>th</sup>  
253 century (Salt 1894), it has not, to our knowledge, been formally considered in conservation  
254 approaches until recently. Two main approaches can be found in the literature. Conservation  
255 welfare (Beausoleil et al. 2018) is a consequentialist perspective that considers conservation  
256 under the prism of animal welfare maximisation (Figure 2). Compassionate conservation (Ramp  
257 and Bekoff 2015, Wallach et al. 2018), also incorporates animal sentience, but from a virtue  
258 ethics perspective. Although conservation welfare aims at aligning with more traditional  
259 conservation approaches presented above (Beausoleil et al. 2018), compassionate conservation  
260 appears to be set on different values and proposes, for example, to incorporate emotion to  
261 provide insight in conservation (Batavia et al. 2021).

## 262 263 **FRAMING MORAL VALUES FOR OBJECTIVE-DRIVEN** 264 **CONSERVATION**

### 265 266 **Formulation of a mathematical framework.**

267  
268 Many of the conflicts in conservation are grounded in the failure to identify and formalize  
269 differences in world views, which contain elements of the four archetypes presented above,  
270 influenced by cultural norms, economic incentives etc. (Essl et al. 2017). Here, we propose a  
271 mathematical formulation as a method to clarify moral discourses in conservation, based on a  
272 consequentialist perspective. We therefore consider an objective-driven type of conservation.  
273 Our purpose is not to argue about the relevance of consequentialism vs. deontology, or on the

274 place of virtue ethics in conservation. Rather, we consider that, from a management perspective,  
275 conservation necessarily includes objective-driven considerations. A better understanding of how  
276 and why objectives can differ between stakeholders as a result of their value systems is therefore  
277 useful to anticipate and manage potential conflicts. Although some participants of the discourse  
278 will be more receptive to discursive than mathematical conceptualisation, we argue that defining  
279 concepts as mathematical terms can make differences in value systems and their normative  
280 postulates more explicit and transparent, which will be beneficial when used with appropriate  
281 stakeholders, even when these terms would be hard to quantify in real life. A mathematical  
282 formulation can be seen as a logic way to express relationships between different elements.  
283 Doing so can help to identify and facilitate the discussion of shared values and incompatibilities  
284 between different environmental policies and management options (Miller et al. 2011), and  
285 contribute to manage conflicts (Redpath et al. 2013). In a similar vein, Parker et al. (1999)  
286 proposed a mathematical framework for assessing the environmental impacts of alien species.  
287 This work was highly influential in the conceptualisation of biological invasions (being cited  
288 over 2,000 times until April 2021 according to Google Scholar), rather than by its direct  
289 quantitative application. We also acknowledge that this approach has specific limitations, which  
290 are discussed below.

291  
292 Our mathematical formalisation conceptualises the consequences of environmental management  
293 actions. As we develop below, these consequences will be defined differently depending on the  
294 value system, but can be understood generally as the consequences for the members of the moral  
295 community. Under anthropocentrism, these will be consequences for humans; under sentientism,  
296 these will be consequences for sentient individuals; under biocentrism and ecocentrism, these  
297 will be consequences for biodiversity. We argue that our mathematical formalisation can account  
298 for these different value systems (see Appendix S1 for an extension to ecocentrism beyond  
299 species and considering wider collectives, i.e. ecosystems), while also accounting for cultural  
300 and personal contexts. These consequences  $C$  can be conceptualised as a combination of the  
301 impact of an action on the different species or individuals involved and the value given to said  
302 species and individuals under different value systems as follows:

303  
304 
$$C = \sum_{species\ s} \bar{I}_s \times V_s \times N_s^a \quad \text{Eq.1}$$

305

306 where  $\bar{I}_s$  is a function (e.g. mean, maximum, etc.) of the impact (direct and indirect) resulting  
307 from the management action on all individuals of species  $s$ ,  $V_s$  is the inherent value attributed to  
308 an individual of species  $s$  (as described above),  $N_s$  is the abundance of species  $s$ , and  $a$   
309 determines the importance given to a species based on its abundance or rarity (and enables to  
310 account for the importance of a species rather than an individual, see below). The unit of  $C$   
311 depends on how other parameters are defined, which themselves depend on the value system  
312 considered. In summary, the higher the impact on species with high values, the higher the  
313 consequences.

314

315 Inherent value  $V_s$  can have a monetary unit or be unit-less depending on how it is defined. It can  
316 be continuous or categorical (e.g. null, low, high – quantifiable as 0, 1, 2 or any other  
317 quantitative scale). Our definition of inherent value here is extremely broad, as the purpose of  
318 this work is not to define what such value should be, rather, it is to be flexible enough to  
319 encompass multiple perspectives and the subjectivity of the assessor, and be based on intrinsic,  
320 utilitarian or relational values (Chan et al. 2016; Table 1).

321

322 The parameter  $a$  can take both positive and negative values. A value of 1 means that  
323 consequences are computed over individuals. If all values  $V_s$  were the same,  $a = 1$  implies that all  
324 individuals in the moral community (Table 1) weigh the same when computing  $C$ , irrespective of  
325 the species they belong to. This is typical of individual-centred value systems, i.e. sentientism,  
326 and biocentrism, whose characteristics (sentience and life) are defined at the individual level. As  
327 a result, impacts on larger populations would weigh more on the consequences. As  $a$  decreases  
328 towards 0, the correlation between the value of a species and its abundance decreases. For  $a = 0$ ,  
329 the consequence of a management action becomes abundance-independent. For  $a < 0$ , rare  
330 species would be valued higher than common species (or the same impact would be considered  
331 to be higher for rare species), for example due to the higher risk of extinction. And for  $a > 1$ ,  
332 disproportionate weight is given to abundant species, which are often important for providing  
333 ecosystem services (Gaston 2010).

334

335 The impact  $I_s$  is computed at the individual level. It can be limited to the probability of death of  
336 individuals or changes in per capita recruitment rate, thus allowing to compute a proxy for  
337 extinction risk if  $a \leq 0$ , but can also include animal welfare, biophysical states, etc. As for  $V_s$ ,  
338 continuous or categorical scales may be used. Different measures of impact can be considered  
339 under a same system of value, in which case Equation 1 should be applied to each one separately  
340 (see section “Application of the mathematical framework” below for details).  $I_s$  can only  
341 encompass the direct impact of a management action (in a narrow view that only the direct  
342 impact of humans, i.e. the moral agents, should be considered, and that the direct impacts from  
343 non-moral agents should not be considered), but also include its indirect impact resulting from  
344 biotic interactions (considering that, in the context of management and therefore human actions,  
345 these indirect impacts are ultimately the result of the actions of the moral agents). One would  
346 therefore need to define a baseline corresponding to either i) the lowest possible measurable level  
347 of impact (e.g. being alive if death is the only measure of impact, or no sign of disease and  
348 starvation for biophysical states; this would obviously be more complicated for welfare), so that  $I$   
349 would only be positive; ii) the current state of the system, in which case impacts could be  
350 positive or negative for different species; or iii) the past state of a system, for example prior to  
351 the introduction of alien species (see (Rohwer and Marris 2021) for a discussion on the notion of  
352 ecosystem integrity). The duration over which to measure such impact should also be  
353 determined. The exact quantification of impact will be influenced by different value systems and  
354 personal subjectivity. Some impacts may be considered incommensurable (Essl et al. 2017),  
355 therefore falling out of the scope of the framework. The average impact  $\bar{I}_s$  over all considered  
356 individuals from a species could be used as a measure at the species-level, as different  
357 individuals may experience different impacts, if the management action targets only part of a  
358 given population. Using the average impact is not without shortcomings though, since it does not  
359 account for potential discrepancies in impacts suffered by different individuals in a population.  
360 In other words, to which point do “the needs of the many outweigh the needs of the few”  
361 (Littmann 2016)? Other measures such as the maximum impact experienced by individuals, or  
362 more complex functions accounting for the variability of impacts and values across individuals  
363 of a same species may also be used, to account for potential disproportionate impacts on a subset  
364 of the considered individuals. Under anthropocentric perspectives, impacts are influenced by the  
365 utilitarian values of species.

366

### 367 **Application of the mathematical framework.**

368

369 Considering Equation 1 in an operational fashion, the consequences  $C$  computed from it can be  
370 interpreted as a constructed attribute to measure the achievement of objectives in conservation  
371 under different value systems (*sensu* Keeney and Gregory 2005). This may be possible for  
372 simple systems with few species and clear categories of values and impacts (Figure 3). However,  
373 for complex systems, a quantitative evaluation of Equation 1 will be difficult or impossible. For  
374 such systems, the purpose of the framework is not to prescribe how such a constructed attribute  
375 should be computed, nor to be used directly as a decision analysis tool (i.e. not to be applied  
376 directly). To be used in such a fashion, constructed attributes need to be unambiguous,  
377 comprehensive, direct, operational, and understandable by the general public (Keeney and  
378 Gregory 2005). Because value systems can be complex, meeting all five criteria is necessarily  
379 difficult. Instead, Equation 1 should be seen as a guide to ask questions that are relevant if  
380 management shall account for different value systems. By **trying** to evaluate Equation 1, one  
381 will have to ask such questions in a systematic fashion (Table 2), while understanding how these  
382 questions are conceptually linked with each other.

383

384 If Equation 1 could be evaluated, for each measure of impact and each system of values,  
385 Equation 1 would produce relative rather than absolute values. The values of consequences  $C$  of  
386 a management action under different value systems and measure of impact cannot be directly  
387 compared with each other, because the unit and range of values of  $C$  can vary between value  
388 systems. Instead, Equation 1 can be used to rank a set of management actions for each value  
389 system or measure of impact based on their assessed consequences, to identify management  
390 actions representing consensus, compromises or conflicts amongst value systems.

391

392 Equation 1 is particularly useful to identify potential moral dilemmas, i.e. situations in which  
393 management options are conflicting under the same value system (Table 1). For example, if  
394 different types of impacts are considered simultaneously under a value system (e.g. economic vs  
395 cultural impacts, or lethal impacts vs. those causing suffering, see sections below), Equation 1

396 might rank management actions differently for these different impacts under the same system of  
397 moral values.

398

399 In some situations the implication of Equation 1 is clear. For example, if an impact is positive on  
400 a highly valued, highly abundant species, but slightly negative for a few individuals of another  
401 species that is not considered very important ( $C = I_+ \times V_{high} \times N_{high} + I_- \times V_{low} \times N_{low}$ ), the  
402 consequence will be positive (Figures 3a<sub>ii</sub>, 4a). However, if the magnitude of the negative  
403 impact is much higher than that of the positive impact ( $|I_+| \ll |I_-|$ ), the consequence can become  
404 negative. Similarly, if impact is negative for the species with the highest value and abundance,  
405 and positive for the other species ( $C = I_- \times V_{high} \times N_{high} + I_+ \times V_{low} \times N_{low}$ ), the situation is  
406 clear if positive and negative impacts have the same magnitude, but it will shift once the  
407 magnitude of the positive impact becomes higher than the magnitude of the negative impact ( $|I_+|$   
408  $> |I_-|$ ; the difference of magnitude will likely be lower than in the first example, because of the  
409 differences in sign; Figures 3a<sub>iii</sub>, 4b). Since impact, value and abundance have different units,  
410 the thresholds at which these shifts occur are difficult to assess, and so the consequences can be  
411 highly debatable. This can create moral dilemmas, e.g. between the desire to have a small  
412 positive impact for a larger population with higher value and the desire to avoid a very negative  
413 impact for the species with the lower value and abundance (Figures 3a<sub>ii</sub>, 4a); and between the  
414 desire to avoid a small negative impact for the larger population with the higher value and the  
415 desire to have a very positive impact for the species with the lower value and abundance (Figures  
416 3a<sub>iii</sub>, 4b). Moral dilemmas will be even more likely to occur if the species with the higher value  
417 has the lower abundance ( $C = I_+ \times V_{high} \times N_{low} + I_- \times V_{low} \times N_{high}$  or  $C = I_- \times V_{high} \times$   
418  $N_{low} + I_+ \times V_{low} \times N_{high}$ ; Figure 3b<sub>ii,iii</sub>). If  $V_{high} \times N_{low} > V_{low} \times N_{high}$ , the example  
419 depicted in Figure 3b<sub>ii</sub> is equivalent to the example depicted in Figures 3a<sub>ii</sub>, 4a described above,  
420 and Figure 3b<sub>iii</sub> is equivalent to the example depicted in Figures 3a<sub>iii</sub>, 4b. If  $V_{high} \times N_{low} <$   
421  $V_{low} \times N_{high}$ , the example depicted in Figure 3b<sub>ii</sub> is equivalent to the example depicted in  
422 Figures 3a<sub>iii</sub>, 4b described above, and Figure 3b<sub>iii</sub> is equivalent to the example depicted in  
423 Figures 3a<sub>ii</sub>, 4a. As above, it is difficult to determine when the inequality will change direction  
424 because of the difference in the units of V and N. This reflects a moral dilemma due to a conflict  
425 between the desire to avoid a negative impact for the larger population and the desire to avoid a  
426 negative impact for the species with the higher value. In summary, uncertainty in the

427 computation of Equation 1, and in particular the need to compare parameters with different units  
428 (i.e. impact, value, and abundance), can therefore be interpreted as a moral dilemma (Figures 3,  
429 4).

430  
431 In addition, some actions might not follow moral norms compared to others despite having more  
432 desirable consequences. For example, killing individuals may be considered less moral, but more  
433 efficient to preserve biodiversity or ecosystem services than using landscape management.  
434 Solving these moral dilemmas is complex, and beyond the scope of this publication, but  
435 approaches such as multi-criteria decision analyses (MCDA; Huang et al. 2011) may offer an  
436 avenue to do so (Goetghebeur and Wagner 2017).

437  
438 Similarly, environmental conflicts will likely emerge when comparing the rankings generated by  
439 Equation 1 under different value systems considering different distributions of values, and  
440 different measures of impact. MCDA (Wittmer et al. 2006) and operational research (Kunsch et  
441 al. 2009), have also been proposed to resolve such conflicts. We nonetheless argue that,  
442 regardless of the capacity to resolve environmental conflicts (or moral dilemmas), being able to  
443 understand where these conflicts emerge from in Equation 1 can be beneficial for decision  
444 making.

445  
446 In the following, we discuss the complexity of assessing the different variables and parameters of  
447 Equation 1 under different value systems using the set of primary questions defined above. By  
448 doing so, it becomes possible to identify ambiguity, difficulty of operationality, etc., to  
449 eventually move towards a good constructed attribute (although such a constructed attribute may  
450 not be reached in practice). We also discuss how, despite the difficulty to quantify the variables  
451 described above, this framework can be used as a heuristic (rather than operational) tool to  
452 capture the implications of considering different value systems for determining the  
453 appropriateness of a conservation action, and to better understand conservation disputes.

454

## 455 **NATURE DESPITE/FOR/AND PEOPLE**

456



457 Over the past decade there has been some debate between proponents of traditional conservation,  
458 and those of new conservation (Table 1), as each group assumes different relationships between  
459 nature and people. Here, we show how the formal conceptualisation of Equation 1 could help  
460 clarifying the position of the new conservation approach in response to its criticisms (Kareiva  
461 2014).

462

### 463 **Nature despite people and traditional conservation**

464

465 Traditional conservation is based on an ecocentric value system and seeks to maximize diversity  
466 of organisms, ecological complexity, and to enable evolution (Soulé 1985). For simplification,  
467 we will consider an extreme perspective of traditional conservation, championed by ‘fortress  
468 conservation’ (Siurua 2006, Büscher 2016), i.e. excluding humans from the moral community.  
469 To capture these aspects, consequences  $C$  in Equation 1 can be more specifically expressed as  
470 follows:

471

$$472 \quad C = \sum_{\text{species } s \text{ (excluding humans)}} \bar{I}_s \times V_s \times N_s^{a < 0} \quad \text{Eq. 2}$$

473

474 Assigning a stronger weight to rare species ( $a < 0$ ) accounts for the fact that rare species are  
475 more likely to go extinct, decreasing the diversity of organisms. Evolution and ecological  
476 complexity are not explicitly accounted for in Equation 2. To do so, one may adapt Equation 2  
477 and consider lineages or functional groups instead of species as the unit over which impacts are  
478 aggregated.

479

480 Because traditional conservation seeks to maximise diversity,  $I_s$  can be defined as the probability  
481 of individuals dying.  $I_s \times N_s^{a < 0}$  will then be proportional to the extinction risk of a species (for an  
482 operational application, a proper model for extinction probability could be used in lieu of  $I_s \times N_s^{a$   
483  $< 0$ ). The  $V_s$  distribution could be considered uniform over all species, in the absence of biases.

484

### 485 **Nature for people and new conservation**

486

487 New conservation considers that many stakeholders (“resource users”, Kareiva, 2014) tend to  
488 have an anthropocentric value system, and that conservation approaches that do not incorporate  
489 such a perspective will likely not succeed at maximizing diversity of organisms (Kareiva and  
490 Marvier 2012, Kareiva 2014). Under anthropocentrism, species are only conserved due to their  
491 utilitarian value, i.e. their effect on  $I$  for humans, rather than based on an inherent value  $V$ .  
492 Different groups of stakeholders are likely to be impacted differently (e.g. different monetary  
493 benefits / losses), and we propose the following extension of Equation 1 to account for this  
494 variability:

$$495 \quad C = \sum_{\text{stakeholders } t} \bar{I}_t \times V_t \times N_t \quad \text{Eq.3}$$

497  
498 where  $\bar{I}_t$  is the average impact of management on the group of stakeholders  $t$ , including indirect  
499 impacts through the effect of management of non-human species.  $\bar{I}_t$  can correspond to economic  
500 impacts, or encompass categorical measures of wellbeing (e.g. Bacher et al. 2018).  $V_t$  is the value  
501 of the group of stakeholders  $t$ , and  $N_t$  is its abundance (i.e. the number of people that compose it).  
502 Parameter  $a$  is set to 1, as this is considered to be an individual-based value system. Note that  
503 including inherent values  $V_t$  in Equation 3 does not imply that we consider that different humans  
504 should be valued differently, but that is a view that some people have, and this needs to appear  
505 here to capture the full spectrum of perceived consequences of a management action.

506  
507 New conservation holds an ambiguous perspective, stating that it should make “sure people  
508 benefit from conservation”, while at the same time does not “want to replace biological-diversity  
509 based conservation with a humanitarian movement” (Kareiva 2014). Using our framework, we  
510 interpret this to mean that one can design management actions that minimize consequences  $C$   
511 under both Equations 2 and 3 (i.e. a mathematical expression of the convergence hypothesis;  
512 Norton 1986). Importantly, minimising Equation 3 is thereby a prerequisite for minimising  
513 impacts  $I$  and hence consequences  $C$  in Equation 2 (Figure 2). Under New conservation,  
514 Equation 2 can therefore be rewritten as follows:

$$515 \quad C = \sum_{\text{species } s \text{ (excluding humans)}} \bar{I}_s(C_{\text{humans}}) \times V_s \times N_s^{a < 0} \quad \text{Eq.4}$$

517

518 Where  $C_{humans}$  is computed using Equation 3.

519

520 The link between biodiversity and ecosystem services is strongly supported, even if many  
521 unknowns remain (Chivian and Bernstein 2008, Cardinale et al. 2012), implying that high  
522 biodiversity can indeed support the provision of ecosystem services to humans. Such an  
523 approach will necessarily distinguish between “useful” species and others, and impacts will be  
524 perceived differently by different groups of stakeholders. Considering multiple types of impacts  
525 (economic benefits/losses, access to nature, health, etc.) while accounting for cultural  
526 differences, would increase the pool of useful species (comparing the resulting equation outputs  
527 using, for example, MCDA). The outcome of the two approaches would then potentially be more  
528 aligned with each other. This broad utilitarian perspective is captured in the most recent  
529 developments of new conservation approaches, which consider a wide range of nature  
530 contributions to people, rather than just ecosystem services (Díaz et al. 2018).

531

## 532 **People and nature**

533

534 People and nature views seek to simultaneously benefit human wellbeing and biodiversity  
535 (Figure 2). Under this perspective, Equations 2 and 3 should therefore be combined in a single  
536 approach, for example using MCDA (Huang et al. 2011; assuming these equations can indeed be  
537 operationally computed), to capture a more diverse set of value systems than Equations 2 and 3  
538 alone, even if the two approaches generate divergent results.

539

540 We expressed traditional and new conservation with Equations 2, 3 and 4, which correspond to  
541 extreme interpretations of these two approaches (excluding humans or considering specific  
542 utilities of species). Doing so illustrates how our mathematical framework can capture in an  
543 explicit fashion the pitfalls of failing to explicitly define normative postulates for conservation  
544 approaches. As a result, Equations 2, 3 and 4 will likely generate conflicting results in the  
545 ranking of different management actions, especially if few types of impacts are considered. The  
546 debates over new conservation have taken place in a discursive fashion, which has not provided a  
547 clear answer to the values defended by this approach (Kareiva 2014, Soulé 2014, Doak et al.  
548 2015). It has therefore been argued that the normative postulates of new conservation need to be

549 more explicitly defined (Miller et al. 2011). Our framework could help doing so, by being more  
550 explicit about how new conservation would be defined relative to the traditional conservation  
551 and the people and nature perspective through the addition of specific terms to Equation 3 and a  
552 thorough comparison of the resulting equations. In particular, it would be interesting to explore,  
553 if inherent values are attributed to different species under a new conservation approach, how  
554 these values are determined compared to a traditional conservation approach (e.g. relational vs.  
555 intrinsic value; Chan et al. 2016; Table 1) and how their distributions differ.

556

## 557 **THE CASE OF ANIMAL WELFARE**

558

559 The question of if and how animal welfare should be integrated into conservation practice is  
560 increasingly debated (Hampton and Hyndman 2018). Recently, conservation welfare (Table 1)  
561 has proposed to consider both the “fitness” (physical states) and “feelings” (mental experiences)  
562 of non-human individuals in conservation practice (Beausoleil et al. 2018). Based on virtue  
563 ethics rather than consequentialism, compassionate conservation (Table 1) also emphasises  
564 animal welfare and is based on the “growing recognition of the intrinsic value of conscious and  
565 sentient animals” (Wallach et al. 2018). It opposes the killing of sentient invasive alien species;  
566 the killing of sentient native predators threatening endangered species; or the killing of sentient  
567 individuals from a given population to fund broader conservation goals.

568

569 Despite the near-universal support of conservation practitioners and scientists for compassion  
570 towards wildlife and ensuring animal welfare (Russell et al. 2016, Hayward et al. 2019, Oommen  
571 et al. 2019), compassionate conservation has sparked vigorous responses (Hampton et al. 2018,  
572 Driscoll and Watson 2019, Hayward et al. 2019, Oommen et al. 2019, Griffin et al. 2020).

573 Amongst the main criticisms of compassionate conservation is that the absence of action can  
574 result in (often well understood and predictable) detrimental effects and increased suffering for  
575 individuals of other or the same species (including humans), as a result of altered biotic  
576 interactions across multiple trophic levels, i.e. “not doing anything” is an active choice that has  
577 consequences (Table 3). However, since compassionate conservation is not based on  
578 consequentialism, it uses different criteria to assess the appropriateness of conservations actions  
579 (but see (Wallach et al. 2020) for responses to some criticisms). Our purpose here is not to

580 discuss the relevance or irrelevance of virtue ethics for conservation (see (Griffin et al. 2020) for  
581 such criticism). Instead, we propose discussing animal welfare from the perspective of  
582 consequentialism (Hampton et al. 2018), i.e. more aligned with the approach of conservation  
583 welfare (Beausoleil et al. 2018), and to show how it may be aligned with or oppose the  
584 traditional and new conservation approaches.

585

## 586 **A mathematical conceptualisation of animal welfare**

587

588 A consequentialist, sentientist perspective aims at maximizing happiness, or conversely  
589 minimising suffering, for all sentient beings, an approach also termed ‘utilitarianism’ (Singer  
590 1980, Varner 2008). Suffering is therefore considered as a measure of impact (or, in  
591 mathematical terms, impact is a function of suffering, which can be expressed as  $I(S_s)$  in  
592 Equation 1).

593

594 It has become widely accepted that animals experience emotions (de Waal 2011). Emotions have  
595 been shown to be linked to cognitive processes (Boissy and Lee 2014), which differ greatly  
596 among species (MacLean et al. 2012), and behavioural approaches have been used to evaluate  
597 and grade emotional responses (e.g. (Désiré et al. 2002); but see (Shriver 2006) and (Bermond et  
598 al. 2001) for different conclusions about the capacity of animals to experience suffering). We  
599 therefore postulate that the quantification of suffering is conceptually feasible in the context of  
600 the heuristic tool presented here. In a utilitarian approach, the inherent value of a species would  
601 therefore be a function of its capacity to experience emotions and suffering  $E_s$ , which can be  
602 expressed as  $V(E_s)$  instead of  $V_s$  in Equation 1.

603

604 Under these considerations for defining impact and value of species, the consequences of a  
605 conservation action can be computed as a function of suffering of individuals from species  $s$   $S_s$ ,  
606 their capacity to experience emotion and suffering  $E_s$ , and the abundance of species  $s$ :

607

$$608 \quad C = \sum_{\text{species } s} \overline{I(S_s)} \times V(E_s) \times N_s^{a=1} \quad \text{Eq.5}$$

609

610 Although  $V(E_s)$  should be measured in an objective fashion, many factors may influence the  
611 relationship between the inherent value and the emotional capacity of a species. For example,  
612 high empathy (Table 1) from the observer will tend to make the distribution uniform, whereas  
613 anthropomorphism and parochialism (Table 1) may lead to higher rating of the emotional  
614 capacities of species phylogenetically close to humans or with which humans are more often in  
615 contact, such as pets. Finally, we assumed that  $a = 1$ , to give equal importance to any individual  
616 regardless of the abundance of its species, as suffering and wellbeing are usually considered at  
617 the individual level (Beausoleil et al. 2018).

618

### 619 **Assessing suffering in the presence and absence of conservation management actions**

620

621 The short-term suffering resulting from pain and directly caused by lethal management actions,  
622 such as the use of poison to control invasive alien species (Twigg and Parker 2010) or the use of  
623 firearms and traps to cull native species threatening other native species (Proulx et al. 2016) or  
624 humans (Gibbs and Warren 2015), is the most straightforward type of suffering that can be  
625 assessed, and is usually sought to be minimised in all conservation approaches. Suffering can  
626 have many other causes, and suffering of an individual may be assessed through a wide variety  
627 of proxies, including access to food and water, death, number of dead kin for social animals,  
628 physiological measurements of stress hormones, etc. Suffering can take various forms, and  
629 commensurability can be an issue (Table 3), making the distinction between the morality of  
630 lethal actions and non-lethal suffering complex. Non-lethal suffering can result from  
631 unfavourable environmental conditions (e.g. leading to food deprivation) and occur over long  
632 periods, while lethal actions could be carried out in a quick, non-painful fashion (Shao et al.  
633 2018), and even lead to improved animal welfare (Wilson and Edwards 2019), but may be  
634 deemed immoral.

635

636 The concept of animal welfare and how to measure it is extremely complex (Beausoleil et al.  
637 2018), and defining it precisely is beyond the scope of this study. We nonetheless advocate a  
638 conceptual approach that takes into account indirect consequences of management actions within  
639 a certain timeframe and consider uncertainty (Table 3). Direct and indirect biotic interactions  
640 may be explicitly modelled to quantify the impact on animals and their suffering. Simulation

641 models can also make projections on how populations may change in time, accounting for future  
642 suffering.

643

### 644 **Are traditional conservation and animal welfare compatible?**

645

646 It has been argued that sentientism and ecocentrism are not fully incompatible (Varner 2011).  
647 The relationship between biodiversity and animal suffering can be formalised more clearly using  
648 the traditional conservation and the sentientist Equations 2 and 4, to explore if the same  
649 management action can minimize the consequences evaluated using the two equations (see also  
650 Appendix S2 for the application of the framework to theoretical cases). The main difference with  
651 the traditional vs new conservation debate here is that Equations 2 and 4 share a number of  
652 species, whereas the new conservation Equation 3 only contains humans, which are excluded  
653 from Equation 2. Even though the variables of Equation 4 differ from those of Equation 2 ( $V$  and  
654  $I$  are computed differently, and the value of  $a$  is different), it is possible that these equations will  
655 vary in similar way for different management actions due to their similar structure, although this  
656 would depend on the variety of impacts on humans that are considered in Equation 3. Finally, as  
657 for the people and nature approach, the consequences of sentientist and ecocentric approaches  
658 can be evaluated in combination, as suggested by conservation welfare (Beausoleil et al. 2018),  
659 using tools such as MCDA (Wittmer et al. 2006, Huang et al. 2011).

660

661 One issue that may be irreconcilable between ecocentric approaches such as traditional  
662 conservation and approaches based on sentientism is the fate of rare and endangered species with  
663 limited or no sentience. Under utilitarian sentientism, the conservation of non-sentient species  
664 ranks lower than the conservation of sentient species, and consequently they are not included in  
665 Equation 4. For example, endangered plant species that are not a resource for the maintenance of  
666 sentient populations would receive no attention, as there would be few arguments for their  
667 conservation. Traditional conservation would focus on their conservation, as they would have a  
668 disproportionate impact in Equation 2, due to low abundance leading to a high value for  $N^{a < 0}$ .

669

670 Finally, it is important to note that the current body of knowledge shows that the link between  
671 biodiversity and animal welfare mentioned above especially applies to the increase of native



672 biodiversity. Local increase of biodiversity due to the introduction of alien species may only be  
673 temporary due to extinction debt (Kuussaari et al. 2009) and often results in a reduction of  
674 ecosystem functioning (Cardinale et al. 2012). Therefore, it is important to distinguish between  
675 nativism (Table 1) and the detrimental effects of *invasive* alien species on biodiversity and  
676 ecosystem functioning and services (Bellard et al. 2016). Nativism would result in increasing the  
677 inherent value  $V_s$  of native species (Figure 1), whereas in the second case, insights from science  
678 on the impact of invasive alien species would modify the distribution  $I(S)$  rather than the  
679 distribution  $V_s$ . This can also apply to native species whose impacts on other species, such as  
680 predation, are increased through environmental changes (Carey et al. 2012).

681

## 682 **UNRESOLVED QUESTIONS AND LIMITATIONS**

683

684 From an operational perspective, this framework shares similarities with mathematical  
685 approaches used in conservation triage (Bottrill et al. 2008), but has two crucial differences.  
686 First, conservation triage is an ecocentric perspective with variables that are comparatively easy  
687 to quantify. Bottrill et al. (2008) provided an example using phylogenetic diversity as a measure  
688 of value  $V$ , and a binomial value  $b$  to quantify biodiversity benefit that can be interpreted as the  
689 presence or absence of a species (i.e.  $I = 1 / b$ ). Because it is ecocentric, local species abundance  
690 is not considered, which corresponds to setting  $a = 0$ . In this example, consequences ( $C$ ) in the  
691 general Equation 1 are therefore defined simply by  $V / b$ .

692

693 In contrast, our framework allows more flexibility to encompass a range of value systems, as  
694 shown above. However, given that the data needed for quantifying parameters of Equations 1 to  
695 4 related to value, impact, emotional capacity and suffering are scarce and often very difficult to  
696 measure, this framework in its current form would be difficult to use as a quantitative decision  
697 tool to evaluate alternative management actions, contrary to triage equations. Rather, our  
698 equations decompose the question underlying many controversies around management decisions  
699 in conservation: what or who is valued, how, and to what extent?

700

701 Despite the difficulty to apply the framework, it can guide the search for approaches that may be  
702 used to develop quantification schemes for the different parameters of the framework and

703 therefore obtain a better appreciation of the different facets of the valuation of nature. For  
704 example, grading systems may be developed to assess impact and suffering based on various  
705 indicators, including appearance, physiology, and behaviour (Broom 1988, Beausoleil et al.  
706 2018). For assessing the value of different species, questionnaires may be used to assess how  
707 different species are valued by people, and influenced by their social and cultural background,  
708 similar to what has been done to assess species charisma (Colléony et al. 2017, Albert et al.  
709 2018). It will nonetheless be important to acknowledge the corresponding uncertainties in the  
710 assessment of impact and value, differences in perception among societal groups for different  
711 taxa and potential shifts in perception over time (Table 3).

712  
713 The second difference from conservation triage is that the latter considers additional criteria that  
714 were not addressed here, including feasibility, cost, and efficiency (including related  
715 uncertainties). The combination of these different perspectives calls for appropriate methods to  
716 include them all in decision making, which can be done using MCDA (Huang et al. 2011). Here,  
717 good communication and transparency of the decision process is key to achieve the highest  
718 possible acceptance across stakeholders, and to avoid biases in public perception (see case  
719 studies below for examples).

720  
721 The issue of spatial and temporal scale also warrants consideration (Table 3). In the case of a  
722 species that may be detrimental to others in a given location but in decline globally, the spatial  
723 scale and the population considered for evaluating the terms of Equations 1 to 4 is crucial to  
724 determine appropriate management actions. Similarly, management actions may also result in a  
725 temporary decrease in welfare conditions for animals, which may increase later on (Ohl and Van  
726 der Staay 2012), or the impacts may be manifested with a temporal lag. In that case, determining  
727 the appropriate time period over which to evaluate the terms of Equations 1 to 4 will not be  
728 straightforward. Impacts will be of different importance depending on whether they occur in the  
729 short- or long-term, especially since long-term impacts are harder to predict and involve higher  
730 uncertainty. Discount rates (Table 3) may therefore be applied, in a similar way they are applied  
731 to the future effects of climate change and carbon emissions (Essl et al. 2018), or to assess the  
732 impact of alien species (Essl et al. 2017).

733

734 Equations 1 to 5 assume that all individuals from a given species have the same value or  
735 emotional capacities (or use the average of the value across individuals). However, intraspecific  
736 differences in value may be important for conservation. For example, reproductively active  
737 individuals contributing to population growth/recovery may be given a higher value in an  
738 ecocentric perspective. Trophy hunters might prefer to hunt adult male deer with large antlers.  
739 Intraspecific value may also vary spatially, for example between individuals in nature reserves or  
740 in highly disturbed ecosystems. Equation 1 may therefore theoretically be adapted to use custom  
741 groups of individuals with specific values within species, similar to Equation 3.

742  
743 Finally, it is crucial to account for biotic interactions in our framework to comprehensively  
744 assess the indirect impacts of management actions on different species (Table 3). Some species  
745 with low values  $V_s$  in a certain value system may be crucial for assessing the impact  $I_s$  on other  
746 species. These biotic interactions will therefore determine the time frame over which the  
747 framework should be applied, as impacts on one species at a given time may have important  
748 repercussions in the future. These biotic interactions can be complex, and several tools, such as  
749 simulation models and ecological network analyses can be used to capture them. Concepts such  
750 as keystone species (Mills et al. 1993) can also offer a convenient way to overcome such  
751 complexity by modifying  $V_s$  rather than  $\bar{I}_s$ . Let us assume that a management action will have a  
752 direct impact on a keystone species, which will result in indirect impacts on multiple other  
753 species with inherent values. Increasing the value of the keystone species can result in the same  
754 assessment of  $C$  as to explicitly model the biotic interactions and compute the resulting indirect  
755 impacts  $\bar{I}_s$ .

## 756 757 758 **CASE STUDIES ILLUSTRATING ETHICAL CONFLICTS IN** 759 **CONSERVATION DECISIONS**

760  
761 In the following, we present three case studies where conservation actions have either failed, had  
762 adverse effects, or were controversial, and we explore how our framework can help to identify  
763 normative postulates underlying these situations. Although these case studies have been  
764 discussed at length in the articles and reports we cite, we argue that our framework helps capture

765 the different components of the controversies in a more straightforward and objective fashion  
766 than using a discursive approach that might require either emotionally loaded language or more  
767 neutral but less understood neologisms.

768  
769 **Invasive alien species management: the case of the alien grey squirrel in Italy**

770  
771 The grey squirrel (*Sciurus carolinensis*) is native to North America and was introduced in  
772 various locations in Europe during the late nineteenth and the twentieth century (Bertolino 2008).  
773 It threatens native European red squirrel (*Sciurus vulgaris*) populations through competitive  
774 exclusion and as a vector of transmission of squirrel poxvirus in Great Britain (Schuchert et al.  
775 2014). Furthermore, it has wider impacts on woodlands and plantations, reducing value of tree  
776 crops, and potentially affects bird populations through nest predation (Bertolino 2008).

777  
778 Based on the impacts of the grey squirrel, an eradication campaign was implemented in 1997 in  
779 Italy, with encouraging preliminary results (Genovesi and Bertolino 2001). However, this  
780 eradication campaign was halted by public pressure from animal rights movements. The strategy  
781 of the animal rights activists consisted in (i) humanising the grey squirrel and using emotive  
782 messages (referring to grey squirrels as “Cip and Ciop”, the Italian names of the Walt Disney  
783 “Chip and Dale” characters) and (ii) minimising or denying the effect of grey squirrel on native  
784 taxa, especially the red squirrel (Genovesi and Bertolino 2001). In addition, the activists did not  
785 mention (iii) the difference in abundance between a small founding population of grey squirrels  
786 that could be eradicated by managers, and a large population of native red squirrels that would be  
787 extirpated or severely impacted by grey squirrels if control was not implemented.

788  
789 Genovesi & Bertolino (2001) explain that the main reason for the failure of the species  
790 management was a different perspective on primary values. The conservation managers,  
791 favouring eradication, based their decision on species valuation, following traditional  
792 conservation. The animal rights activists, opposed to control, focussed on animal welfare.  
793 Applying the framework, and assuming an individual-based value system ( $a = 1$  in Equation 1),  
794 three questions are apparent (Table 2):

795

- 796 (i) Are the values of red and grey squirrels different?  
797 (ii) What types of impact are we considering?  
798 (iii) Is the population of red squirrels impacted by grey squirrels larger than the population of  
799 grey squirrels to be controlled?

800

801 The arguments of animal rights activists led to the following answers to these three questions. (i)  
802 The humanisation of the grey squirrel consists of increasing the perception of its emotional  
803 capacity  $E_{gs} > E_{rs}$  (and therefore  $V(E_{gs}) > V(E_{rs})$ ). (ii) Minimising the impact of the grey squirrel  
804 is equal to restricting the time scale to a short one and to likely minimising the amount of  
805 suffering  $S$  caused by grey squirrels on other species (under a sentientist perspective), or the  
806 number of red squirrels that will die because of grey squirrels (under a biocentric perspective). In  
807 other words,  $S_{gs} = S_{rs}$  (and therefore  $I(S_{gs}) = I(S_{rs})$ ) or  $I_{gs} = I_{rs}$  without management and  $S_{gs} > S_{rs}$   
808 (and therefore  $I(S_{gs}) > I(S_{rs})$ ) or  $I_{gs} > I_{rs}$  under management. (iii) Not mentioning differences in  
809 species abundance implies that the impacted populations of red and grey squirrels would have  
810 the same size under any management. Following these three points, the consequences under  
811 management  $C_m = I(S_{gs}) \times V(E_{gs}) + I(S_{rs}) \times V(E_{rs})$  are higher than without management,  
812 due to the increase in  $V(E_{gs})$  and  $I(S_{gs})$ . The application of our framework therefore allows to  
813 clarify a discourse whose perception could otherwise be altered because of techniques such as  
814 appeal to emotion.

815

816 The framework can thus be used to provide recommendations for what the advocates for the  
817 eradication campaign would have needed to have done: i) increase the value  $E_{rs}$  of red squirrels  
818 in a similar way as what was done for grey squirrels, so that their relative values compared to  
819 grey squirrels would remain the same as before the communication campaign by the animal right  
820 activists; ii) better explain the differences in animal death and suffering caused by the long-term  
821 presence of the grey squirrel compared to the short-term, carefully designed euthanasia protocol,  
822 which would avoid a subjective perception of the distribution of  $S$ ; and iii) highlight the  
823 differences in the number of individuals affected. The consequences would then be computed as  
824  $C = V(E_{gs}) \times I(S_{gs}) \times N_{gs} + V(E_{rs}) \times I(S_{rs}) \times N_{rs}$ . In that case, assuming for simplification  
825 the same suffering through euthanasia for grey squirrels as red squirrels suffer from the grey  
826 squirrels, and the same value to individuals of each species (i.e. avoiding nativism), the mere

827 differences  $N_{rs} > N_{gs}$  in abundance would lead to a higher value of  $C$  without management. This  
828 would further increase by extending the impacts of grey squirrels to other species, as mentioned  
829 above.

830  
831 A more fundamental issue, however, is that in some value systems it would not be acceptable to  
832 actively kill individuals, even if that meant letting grey squirrels eliminate red squirrels over long  
833 periods of time (Wallach et al. 2018). The reluctance to support indirectly positive conservation  
834 programs is a common issue (Courchamp et al. 2017). Whether an acceptable threshold on  
835 consequences over which killing individuals could be determined through discussion would  
836 depend, in part, on the willingness of the affected parties to compromise.

837  
838 **De-domestication: the case of Oostvaardersplassen nature reserve**

839  
840 De-domestication, the intentional reintroduction of domesticated species to the wild, is a recent  
841 practice in conservation that raises new ethical questions related to the unique status of these  
842 species (Gamborg et al. 2010). Oostvaardersplassen is a Dutch nature reserve. Reserve managers,  
843 recognising that grazing by large herbivore was a key natural ecosystem process that had been  
844 lost, decided between 1983 and 1992 to reintroduce red deer (*Cervus elaphus*), and two  
845 domesticated species (Heck cattle, *Bos primigenius*, and konik horses, *Equus ferus caballus*)  
846 (ICMO2 2010). The populations of these three species increased rapidly, as natural predators  
847 were missing and, as a result of a ‘non-intervention-strategy’, no active population control  
848 measures were implemented. The project was widely criticized when a considerable number of  
849 individuals died from starvation during a harsh winter, resulting in the subsequent introduction of  
850 culls.

851  
852 From a traditional conservation perspective, disregarding animal welfare and focusing on species  
853 diversity and ecological restoration, the project was a success. The introduction of the three  
854 herbivore species led to sustainable populations (despite high winter mortality events), and  
855 ensured stability of bird populations without the need for further interventions (ICMO2 2010),  
856 i.e. the conditions of many species were improved (the impact was lowered), leading to  
857 improved consequences  $C$  for biodiversity overall (Equation 2). In other words, since more

858 individuals from all species survived ( $I$  increased in Equation 2),  $C$  improved overall, regardless  
859 of differences in value or abundance between species (a multi-species generalisation of the  
860 Figure 2i).

861  
862 However, the welfare of individuals from the three charismatic large herbivorous species became  
863 a point of conflict. In terms of the framework, it appears that the conflict was driven by  
864 considering the outcome of Equation 5 in addition to that of Equation 2 to estimate the overall  
865 evaluation of the management approach, i.e. a change from only considering impacts on  
866 individual survival to also considering impacts based on suffering, with the acknowledgement  
867 that  $E_s$  should be considered (Ohl and Van der Staay 2012). Not considering Equation 5 would  
868 mean that  $C = 0$  under sentientism, but acknowledging the existence of  $E_s$  implies that  $C =$   
869  $V(E_s) \times I(S_s) \times N_s^1$  becomes non-null. Changes in perspective over time should therefore be  
870 taken into account when implementing conservation management actions, and adaptive  
871 management approaches should be considered. A possible explanation for this shift in attitude is  
872 the notion of responsibility (Table 3). Culling animals might be acceptable in some cases, but  
873 might not be if these individuals were purposefully introduced, which may lead to considering a  
874 sentientist perspective.

875  
876 The reserve managers have examined a number of sustainable measures to improve the welfare  
877 of individuals from the three species (therefore decreasing  $S_s$  to compensate the increase in  $V_s$ ).  
878 Among those were recommendations to increase access to natural shelter in neighbouring areas  
879 of woodland or forestry, to create shelter ridges to increase survival in winter as an ethical and  
880 sustainable solution, and to use early culling to regulate populations and avoid suffering from  
881 starvation in winter (ICMO2 2010). This example shows how a combination of two  
882 complementary management actions (the rewilding of the OVP and the provision of shelter) led  
883 to minimised consequences under both the traditional conservation and the sentientist Equations  
884 2 and 5, whereas only rewilding would increase consequences under Equation 5. Culling may  
885 still face opposition based on moral arguments though. Interestingly other approaches, such as  
886 the reintroduction of large predators, were also considered but discarded due to a lack of  
887 experience and too many uncertainties in efficiency (ICMO2 2010). Our suggested framework  
888 could be adapted to explore the consequences of culling vs. increased mortality through the



889 reintroduction of large predators, noting again that some stakeholders may make moral  
890 distinctions between natural mortality and human-induced mortality.

891

## 892 **Trophy hunting**

893

894 Trophy hunting, the use of charismatic species for hunting activities, has been argued to be good  
895 for conservation when revenues are reinvested properly into nature protection and redistributed  
896 across local communities, but faces criticisms for moral reasons (Lindsey et al. 2007b, Di Minin  
897 et al. 2016). The action of killing some individuals to save others might be incompatible with a  
898 deontological perspective, but, assuming a consequentialist perspective, the framework can be  
899 applied to formalise the assessment of different management options. Note that here, we are not  
900 considering the ethics of how the hunt itself is carried out (e.g. canned hunting vs. a "fair chase")  
901 nor how animals are reared (i.e. whether they can express their natural behaviours), recognising  
902 that both these factors would need to be considered when making a decision.

903

904 In traditional conservation, trophy hunting is desirable if it directly contributes to the  
905 maintenance of species diversity. That is, it should decrease impacts  $I$  evaluated as individual  
906 survival over all or the majority of species with high inherent value, leading to improved  
907 consequences for biodiversity  $C$  in Equation 2 (a multi-species generalisation of Figures 2i and  
908 2ii). The potential of trophy hunting to contribute to the maintenance of biodiversity is via  
909 creating economic revenues, i.e. an anthropocentric perspective, and it therefore falls under the  
910 umbrella of new conservation (Figure 2; Equation 4). In theory, trophy hunting should lead to  
911 lower consequences than doing nothing for both the traditional and new conservation (Equations  
912 2, 3 and 4), and therefore for the 'people and nature' approach, as they are in this case not  
913 independent from each other (Lindsey et al. 2007a). Many social and biological factors currently  
914 affect the efficacy of trophy hunting as a conservation tool. Corruption and privatisation of the  
915 benefits have sometimes prevented the revenues to be reinvested into conservation, but also to be  
916 redistributed across local communities, whereas doing so has been shown to increase their  
917 participation in conservation actions with proven benefits for local biodiversity (Di Minin et al.  
918 2016). In other words, a decrease in the anthropocentric Equation 2 leads to a decrease in the  
919 ecocentric Equation 3, but the causal link (Equation 4) is still supposed to be valid. In addition,

920 trophy hunting can lead to unexpected evolutionary consequences (Coltman et al. 2003),  
921 overharvesting of young males (Lindsey et al. 2007b), and disproportionate pressure on  
922 threatened species (Palazy et al. 2011, 2012, 2013) and therefore to population declines and  
923 potential detrimental effects on biodiversity. That means that  $I(C_{\text{humans}})$  in Equation 4 should be  
924 carefully examined. Despite these issues, it has been argued that banning trophy hunting may  
925 create replacement activities that would be more detrimental to biodiversity (Di Minin et al.  
926 2016).

927  
928 From an animal welfare perspective, trophy hunting appears to be in direct contradiction with a  
929 decrease in animal suffering, and has been criticised by proponents of compassionate  
930 conservation (Wallach et al. 2018). However, as for the culling of invasive alien species, we  
931 suspect the story is more complex. First, there may be direct benefits for animal welfare, if  
932 money from trophy hunting is reinvested in protection measures against poaching (if such  
933 poaching causes, on balance, more suffering). Second, to our knowledge, only few studies have  
934 compared the welfare of individual animals to quantify the elements of the sentientist Equation 5  
935 (for example assessed through access to resources) in areas where trophy hunting is practiced  
936 and where it is not. Given the links between biodiversity and animal welfare described above, it  
937 seems plausible that good practice in trophy hunting may benefit the welfare of individuals from  
938 other and from the same species.

939

## 940 **CONCLUSIONS**

941

942 A variety of value systems exist in conservation, which are based on different underlying  
943 normative postulates and can differ between stakeholders, resulting in differing preferences for  
944 conservation practices among people. Here, we have proposed a framework with a formal set of  
945 equations to conceptualize and decompose these different perspectives from a consequentialist  
946 point of view. In this framework, the different value systems supported by different conservation  
947 approaches follow the same structure, but can differ in the variables that are used, and in the  
948 values they are taking. Such a formalisation by necessity does not capture the full range of  
949 complex and nuanced real-world situations in environmental decision-making, and the elements  
950 of the equations can be difficult to estimate. However, this framework is not intended to be an

951 operational approach readily applicable across all value systems. Rather, the mathematical  
952 structure and the systematic examination of the elements of the framework provides a method to  
953 make their underlying value systems and the resulting conflicts explicit and transparent, which is  
954 essential for the planning and implementation of pro-active management. The search for  
955 consensus in conservation can be counter-productive and favour status-quo or ‘do nothing’  
956 against pro-active management (Peterson et al. 2005), however our framework may help identify  
957 hidden commonalities between seemingly antagonistic stances. We hope that this framework can  
958 foster fruitful debates and thus facilitate the resolution of contested conservation issues, and will  
959 ultimately contribute to a broader appreciation of different viewpoints. In an increasingly  
960 complex world shaped by human activities, this is becoming ever more important.

961

962

## 963 **Acknowledgements**

964

965 We thank Franck Courchamp, Vincent Devictor, Jordan Hampton, Jonathan Jeschke, and  
966 Thomas Potthast for extremely useful comments on previous versions of this manuscript. This  
967 research was funded through the 2017-2018 Belmont Forum and BiodivERsA joint call for  
968 research proposals, under the BiodivScen ERA-Net COFUND programme, and with the funding  
969 organisations Austrian Science Foundation FWF for GL, BL, AS, FE, and SD (BiodivERsA-  
970 Belmont Forum Project 'Alien Scenarios', grant no. I 4011-B32; grant no. I3757-B29). AP was  
971 funded by Conicyt PIA CCTE AFB170008 and ANID PIA FB210006. IJ acknowledges support  
972 by the J. E. Purkyně Fellowship of the Czech Academy of Sciences. JR UW thanks the South  
973 African Department of Forestry, Fisheries, and the Environment (DFFE) for funding noting that  
974 this publication does not necessarily represent the views or opinions of DFFE or its employees.  
975 We appreciate the helpful comments of Tina Heger and one anonymous reviewer.

976

977

## REFERENCES

- 978 Albert C, Luque GM, Courchamp F (2018) The twenty most charismatic species. *PloS One* 13: e0199149.  
979 <https://doi.org/10.1371/journal.pone.0199149>
- 980 Alexander L, Moore M (2016) Deontological Ethics. *The Stanford Encyclopedia of Philosophy*.
- 981 Allen C, Trestman M (2017) Animal Consciousness. *The Stanford Encyclopedia of Philosophy*.
- 982 Bacher S, Blackburn TM, Essl F, Genovesi P, Heikkilä J, Jeschke JM, Jones G, Keller R, Kenis M,  
983 Kueffer C, Martinou AF, Nentwig W, Pergl J, Pysšek P, Rabitsch W, Richardson DM, Roy HE,  
984 Saul W-C, Scalera R, Vilà M, Wilson JRU, Kumschick S (2018) Socio-economic impact  
985 classification of alien taxa (SEICAT). *Methods in Ecology and Evolution* 9: 159–168.  
986 <https://doi.org/10.1111/2041-210X.12844>
- 987 Batavia C, Nelson MP, Bruskotter JT, Jones MS, Yanco E, Ramp D, Bekoff M, Wallach AD (2021)  
988 Emotion as a source of moral understanding in conservation. *Conservation Biology* 35: 1380–  
989 1387. <https://doi.org/10.1111/cobi.13689>
- 990 Beausoleil NJ, Mellor DJ, Baker L, Baker SE, Bellio M, Clarke AS, Dale A, Garlick S, Jones B, Harvey  
991 A (2018) “Feelings and Fitness” not “Feelings or Fitness” – the *raison d’être* of conservation  
992 welfare, which aligns conservation and animal welfare objectives. *Frontiers in veterinary science*  
993 5: 296. <https://doi.org/10.3389/fvets.2018.00296>
- 994 Bellard C, Cassey P, Blackburn TM (2016) Alien species as a driver of recent extinctions. *Biology letters*  
995 12: 20150623. <https://doi.org/10.1098/rsbl.2015.0623>
- 996 Bermond B, Armstrong SJ, Botzler RG (2001) A neuropsychological and evolutionary approach to  
997 animal consciousness and animal suffering. *Animal Welfare* 10: 47–62.
- 998 Bertolino S (2008) Introduction of the American grey squirrel (*Sciurus carolinensis*) in Europe: a case  
999 study in biological invasion. *Current Science* 95: 903–906.
- 1000 Bhagwat SA, Dudley N, Harrop SR (2011) Religious following in biodiversity hotspots: challenges and  
1001 opportunities for conservation and development. *Conservation Letters* 4: 234–240.  
1002 <https://doi.org/10.1111/j.1755-263X.2011.00169.x>
- 1003 Boissy A, Lee C (2014) How assessing relationships between emotions and cognition can improve farm  
1004 animal welfare. *Revue scientifique et technique (International Office of Epizootics)* 33: 103–110.
- 1005 Bolund P, Hunhammar S (1999) Ecosystem services in urban areas. *Ecological economics* 29: 293–301.  
1006 [https://doi.org/10.1016/S0921-8009\(99\)00013-0](https://doi.org/10.1016/S0921-8009(99)00013-0)
- 1007 Bottrill MC, Joseph LN, Carwardine J, Bode M, Cook C, Game ET, Grantham H, Kark S, Linke S,  
1008 McDonald-Madden E (2008) Is conservation triage just smart decision making? *Trends in*  
1009 *Ecology & Evolution* 23: 649–654. <https://doi.org/10.1016/j.tree.2008.07.007>
- 1010 Brennan A, Lo Y-S (2016) Environmental Ethics. *The Stanford Encyclopedia of Philosophy*.
- 1011 Broom DM (1988) The scientific assessment of animal welfare. *Applied Animal Behaviour Science* 20:  
1012 5–19. [https://doi.org/10.1016/0168-1591\(88\)90122-0](https://doi.org/10.1016/0168-1591(88)90122-0)

- 1013 Büscher B (2016) Reassessing fortress conservation? New media and the politics of distinction in Kruger  
1014 National Park. *Annals of the American Association of Geographers* 106: 114–129.  
1015 <https://doi.org/10.1080/00045608.2015.1095061>
- 1016 Cardinale BJ, Duffy JE, Gonzalez A, Hooper DU, Perrings C, Venail P, Narwani A, Mace GM, Tilman  
1017 D, Wardle DA, Kinzig A, Daily GC, Loreau M, Grace JB, Larigauderie A, Srivastava DS, Naeem  
1018 S (2012) Biodiversity loss and its impact on humanity. *Nature* 486: 59.  
1019 <https://doi.org/10.1038/nature11148>
- 1020 Carey MP, Sanderson BL, Barnas KA, Olden JD (2012) Native invaders—challenges for science,  
1021 management, policy, and society. *Frontiers in Ecology and the Environment* 10: 373–381.  
1022 <https://doi.org/10.1890/110060>
- 1023 Chan KMA, Balvanera P, Benessaiah K, Chapman M, Díaz S, Gómez-Baggethun E, Gould R, Hannahs  
1024 N, Jax K, Klain S, Luck GW, Martín-López B, Muraca B, Norton B, Ott K, Pascual U, Satterfield  
1025 T, Tadaki M, Taggart J, Turner N (2016) Opinion: Why protect nature? Rethinking values and the  
1026 environment. *Proceedings of the National Academy of Sciences* 113: 1462 LP – 1465.  
1027 <https://doi.org/10.1073/pnas.1525002113>
- 1028 Chivian E, Bernstein A (2008) *Sustaining life: how human health depends on biodiversity*. Oxford  
1029 University Press, New York.
- 1030 Cohen-Shacham E, Walters G, Janzen C, Maginnis S (2016) Nature-based solutions to address global  
1031 societal challenges. IUCN, Gland, Switzerland 97.
- 1032 Colléony A, Clayton S, Couvet D, Saint Jalme M, Prévot A-C (2017) Human preferences for species  
1033 conservation: Animal charisma trumps endangered status. *Biological Conservation* 206: 263–269.  
1034 <https://doi.org/10.1016/j.biocon.2016.11.035>
- 1035 Coltman DW, O’Donoghue P, Jorgenson JT, Hogg JT, Strobeck C, Festa-Bianchet M (2003) Undesirable  
1036 evolutionary consequences of trophy hunting. *Nature* 426: 655.  
1037 <https://doi.org/10.1038/nature02177>
- 1038 Costanza R, D’Arge R, De Groot R, Farber S, Grasso M, Hannon B, Limburg K, Naeem S, O’neill R V,  
1039 Paruelo J, Raskin RG, Sutton P, van den Belt M (1997) The value of the world’s ecosystem  
1040 services and natural capital. *Nature* 387: 253–260. [https://doi.org/10.1016/S0921-8009\(98\)00020-](https://doi.org/10.1016/S0921-8009(98)00020-2)  
1041 [2](https://doi.org/10.1016/S0921-8009(98)00020-2)
- 1042 Courchamp F, Jaric I, Albert C, Meinard Y, Ripple WJ, Chapron G (2018) The paradoxical extinction of  
1043 the most charismatic animals. *PLoS biology* 16: e2003997.  
1044 <https://doi.org/10.1371/journal.pbio.2003997>
- 1045 Courchamp F, Fournier A, Bellard C, Bertelsmeier C, Bonnaud E, Jeschke JM, Russell JC (2017)  
1046 Invasion biology: specific problems and possible solutions. *Trends in Ecology & Evolution* 32:  
1047 13–22. <https://doi.org/10.1016/j.tree.2016.11.001>
- 1048 Crowley SL, Hinchliffe S, McDonald RA (2017) Conflict in invasive species management. *Frontiers in*  
1049 *Ecology and the Environment* 15: 133–141. <https://doi.org/10.1002/fee.1471>
- 1050 Dawkins MS (2008) The science of animal suffering. *Ethology* 114: 937–945.  
1051 <https://doi.org/10.1111/j.1439-0310.2008.01557.x>

- 1052 Désiré L, Boissy A, Veissier I (2002) Emotions in farm animals: a new approach to animal welfare in  
1053 applied ethology. *Behavioural processes* 60: 165–180. <https://doi.org/10.1016/S0376->  
1054 6357(02)00081-5
- 1055 Díaz S, Pascual U, Stenseke M, Martín-López B, Watson RT, Molnár Z, Hill R, Chan KMA, Baste IA,  
1056 Brauman KA (2018) Assessing nature’s contributions to people. *Science* 359: 270–272.  
1057 <https://doi.org/10.1126/science.aap8826>
- 1058 Doak DF, Bakker VJ, Goldstein BE, Hale B (2015) What is the future of conservation? In: *Protecting the*  
1059 *wild*. Springer, 27–35. [https://doi.org/10.5822/978-1-61091-551-9\\_4](https://doi.org/10.5822/978-1-61091-551-9_4)
- 1060 Driscoll DA, Watson MJ (2019) Science denialism and compassionate conservation: response to Wallach  
1061 et al. 2018. *Conservation Biology* 33: 777–780. <https://doi.org/10.1111/cobi.13273>
- 1062 Dubois S, Fenwick N, Ryan EA, Baker L, Baker SE, Beausoleil NJ, Carter S, Cartwright B, Costa F,  
1063 Draper C (2017) International consensus principles for ethical wildlife control. *Conservation*  
1064 *Biology* 31: 753–760. <https://doi.org/10.1111/cobi.12896>
- 1065 Essl F, Erb K, Glatzel S, Pauchard A (2018) Climate change, carbon market instruments, and  
1066 biodiversity: focusing on synergies and avoiding pitfalls. *Wiley Interdisciplinary Reviews:*  
1067 *Climate Change* 9: e486. <https://doi.org/10.1002/wcc.486>
- 1068 Essl F, Hulme PE, Jeschke JM, Keller R, Pyšek P, Richardson DM, Saul W-C, Bacher S, Dullinger S,  
1069 Estévez RA, Kueffer C, Roy HE, Seebens H, Rabitsch W (2017) Scientific and normative  
1070 foundations for the valuation of alien-species impacts: thirteen core principles. *BioScience* 67:  
1071 166–178. <https://doi.org/10.1093/biosci/biw160>
- 1072 Farah MJ (2008) Neuroethics and the problem of other minds: Implications of neuroscience for the moral  
1073 status of brain-damaged patients and nonhuman animals. *Neuroethics* 1: 9–18.  
1074 <https://doi.org/10.1007/s12152-008-9006-8>
- 1075 Fisher B, Turner K, Zylstra M, Brouwer R, De Groot R, Farber S, Ferraro P, Green R, Hadley D, Harlow  
1076 J (2008) Ecosystem services and economic theory: integration for policy-relevant research.  
1077 *Ecological applications* 18: 2050–2067. <https://doi.org/10.1890/07-1537.1>
- 1078 Gamborg C, Gremmen B, Christiansen SB, Sandoe P (2010) De-domestication: ethics at the intersection  
1079 of landscape restoration and animal welfare. *Environmental Values* 19: 57–78.  
1080 <https://doi.org/10.3197/096327110X485383>
- 1081 Garibaldi A, Turner N (2004) Cultural keystone species: implications for ecological conservation and  
1082 restoration. *Ecology and society* 9.
- 1083 Gaston KJ (2010) Valuing common species. *Science* 327: 154–155.  
1084 <https://doi.org/10.1126/science.1182818>
- 1085 Genovesi P, Bertolino S (2001) Human dimension aspects in invasive alien species issues: the case of the  
1086 failure of the grey squirrel eradication project in Italy. *The great reshuffling: human dimensions*  
1087 *of invasive alien species*. IUCN, Gland: 113–119.
- 1088 Gibbs EPJ (2014) The evolution of One Health: a decade of progress and challenges for the future.  
1089 *Veterinary Record* 174: 85–91. <https://doi.org/10.1136/vr.g143>



- 1090 Gibbs L, Warren A (2015) Transforming shark hazard policy: Learning from ocean-users and shark  
1091 encounter in Western Australia. *Marine Policy* 58: 116–124.  
1092 <https://doi.org/10.1016/j.marpol.2015.04.014>
- 1093 Goetghebeur M, Wagner M (2017) Identifying Value(s): A Reflection on the Ethical Aspects of MCDA  
1094 in Healthcare Decisionmaking BT - Multi-Criteria Decision Analysis to Support Healthcare  
1095 Decisions. In: Marsh K, Goetghebeur M, Thokala P, Baltussen R (Eds), Springer International  
1096 Publishing, Cham, 29–46. [https://doi.org/10.1007/978-3-319-47540-0\\_3](https://doi.org/10.1007/978-3-319-47540-0_3)
- 1097 Griffin AS, Callen A, Klop-Toker K, Scanlon RJ, Hayward MW (2020) Compassionate conservation  
1098 clashes with conservation biology: should empathy, compassion, and deontological moral  
1099 principles drive conservation practice? *Frontiers in Psychology* 11: 1139.  
1100 <https://doi.org/10.3389/fpsyg.2020.01139>
- 1101 Hampton JO, Hyndman TH (2018) Underaddressed animal welfare issues in conservation. *Conservation*  
1102 *Biology*: 803–811. <https://doi.org/10.1111/cobi.13267>
- 1103 Hampton JO, Warburton B, Sandøe P (2018) Compassionate versus consequentialist conservation.  
1104 *Conservation Biology* 33: 751–759. <https://doi.org/10.1111/cobi.13249>
- 1105 Hayward MW, Callen A, Allen BL, Ballard G, Broekhuis F, Bugir C, Clarke RH, Clulow J, Clulow S,  
1106 Daltry JC, Davies-Mostert HT, Fleming PJS, Griffin AS, Howell LG, Kerley GIH, Klop-Toker K,  
1107 Legge S, Major T, Meyer N, Montgomery RA, Moseby K, Parker DM, Périquet S, Read J,  
1108 Scanlon R, Seeto R, Shuttleworth C, Somers MJ, Tamessar CT, Tuft K, Upton R, Valenzuela-  
1109 Molina M, Wayne A, Witt RR, Wüster W (2019) Deconstructing compassionate conservation.  
1110 *Conservation Biology* 33: 760–768. <https://doi.org/10.1111/cobi.13366>
- 1111 Huang IB, Keisler J, Linkov I (2011) Multi-criteria decision analysis in environmental sciences: ten years  
1112 of applications and trends. *Science of the total environment* 409: 3578–3594.  
1113 <https://doi.org/10.1016/j.scitotenv.2011.06.022>
- 1114 Hursthouse R, Pettigrove G (2018) Virtue Ethics. *The Stanford Encyclopedia of Philosophy*.
- 1115 ICMO2 (2010) Report of the second International Commission on Management of the  
1116 Oostvaardersplassen (ICMO2). Natural processes, animal welfare, moral aspects and  
1117 management of the Oostvaardersplassen. The Hague/Wageningen, Netherlands. Wing rapport  
1118 039. November 2010.
- 1119 IUCN (2019) The IUCN Red List of Threatened Species. Version 2019-1. <<http://www.iucnredlist.org>>.
- 1120 IUCN-CEM (2016) The IUCN Red List of Ecosystems. Version 2016-1. <<http://iucnrl.org>>.
- 1121 Jarić I, Courchamp F, Correia RA, Crowley SL, Essl F, Fischer A, González-Moreno P, Kalinkat G,  
1122 Lambin X, Lenzner B (2020) The role of species charisma in biological invasions. *Frontiers in*  
1123 *Ecology and the Environment* 18: 345–353. <https://doi.org/10.1002/fee.2195>
- 1124 Kareiva P (2014) New conservation: setting the record straight and finding common ground.  
1125 *Conservation Biology* 28: 634–636. <https://doi.org/10.1111/cobi.12295>
- 1126 Kareiva P, Marvier M (2012) What is conservation science? *BioScience* 62: 962–969.  
1127 <https://doi.org/10.1525/bio.2012.62.11.5>



- 1128 Katz E, Light A (2013) *Environmental Pragmatism*. Taylor & Francis.
- 1129 Keeney RL, Gregory RS (2005) Selecting Attributes to Measure the Achievement of Objectives.  
1130 *Operations Research* 53: 1–11. <https://doi.org/10.1287/opre.1040.0158>
- 1131 Kunsch PL, Kavathatzopoulos I, Rauschmayer F (2009) Modelling complex ethical decision problems  
1132 with operations research. *Omega* 37: 1100–1108. <https://doi.org/10.1016/j.omega.2008.11.006>
- 1133 Kuussaari M, Bommarco R, Heikkinen RK, Helm A, Krauss J, Lindborg R, Öckinger E, Pärtel M, Pino J,  
1134 Rodà F (2009) Extinction debt: a challenge for biodiversity conservation. *Trends in Ecology &*  
1135 *Evolution* 24: 564–571. <https://doi.org/10.1016/j.tree.2009.04.011>
- 1136 Lindsey PA, Roulet PA, Romanach SS (2007a) Economic and conservation significance of the trophy  
1137 hunting industry in sub-Saharan Africa. *Biological Conservation* 134: 455–469.  
1138 <https://doi.org/10.1016/j.biocon.2006.09.005>
- 1139 Lindsey PA, Frank LG, Alexander R, Mathieson A, Romanach SS (2007b) Trophy hunting and  
1140 conservation in Africa: problems and one potential solution. *Conservation biology* 21: 880–883.  
1141 <https://doi.org/10.1111/j.1523-1739.2006.00594.x>
- 1142 Littmann G (2016) “The Needs of the Many Outweigh the Needs of the Few”: Utilitarianism and Star  
1143 Trek. *The Ultimate Star Trek and Philosophy*: 127–137.  
1144 <https://doi.org/10.1002/9781119146032.ch12>
- 1145 Mace GM (2014) Whose conservation? *Science* 345: 1558–1560.  
1146 <https://doi.org/10.1126/science.1254704>
- 1147 Mace GM, Lande R (1991) Assessing Extinction Threats: Toward a Reevaluation of IUCN Threatened  
1148 Species Categories. *Conservation Biology* 5: 148–157. [https://doi.org/10.1111/j.1523-](https://doi.org/10.1111/j.1523-1739.1991.tb00119.x)  
1149 [1739.1991.tb00119.x](https://doi.org/10.1111/j.1523-1739.1991.tb00119.x)
- 1150 MacLean EL, Matthews LJ, Hare BA, Nunn CL, Anderson RC, Aureli F, Brannon EM, Call J, Drea CM,  
1151 Emery NJ (2012) How does cognition evolve? *Phylogenetic comparative psychology*. *Animal*  
1152 *cognition* 15: 223–238. <https://doi.org/10.1007/s10071-011-0448-8>
- 1153 McConnell T (2018) Moral Dilemmas. *The Stanford Encyclopedia of Philosophy*. Available from:  
1154 <https://plato.stanford.edu/archives/fall2018/entries/moral-dilemmas/>.
- 1155 Miller TR, Minter BA, Malan L-C (2011) The new conservation debate: the view from practical ethics.  
1156 *Biological Conservation* 144: 948–957. <https://doi.org/10.1016/j.biocon.2010.04.001>
- 1157 Mills LS, Soulé ME, Doak DF (1993) The keystone-species concept in ecology and conservation.  
1158 *BioScience* 43: 219–224. <https://doi.org/10.2307/1312122>
- 1159 Di Minin E, Leader-Williams N, Bradshaw CJA (2016) Banning trophy hunting will exacerbate  
1160 biodiversity loss. *Trends in Ecology & Evolution* 31: 99–102.  
1161 <https://doi.org/10.1016/j.tree.2015.12.006>
- 1162 Norton BG (1984) Environmental ethics and weak anthropocentrism. *Environmental ethics* 6: 131–148.  
1163 <https://doi.org/10.5840/enviroethics19846233>

- 1164 Norton BG (1986) Conservation and preservation: A conceptual rehabilitation. *Environmental Ethics* 8:  
1165 195–220. <https://doi.org/10.5840/enviroethics1986832>
- 1166 Norton BG (2000) Biodiversity and environmental values: in search of a universal earth ethic.  
1167 *Biodiversity & Conservation* 9: 1029–1044. <https://doi.org/10.1023/A:1008966400817>
- 1168 Ohl F, Van der Staay FJ (2012) Animal welfare: At the interface between science and society. *The*  
1169 *Veterinary Journal* 192: 13–19. <https://doi.org/10.1016/j.tvjl.2011.05.019>
- 1170 Oommen MA, Cooney R, Ramesh M, Archer M, Brockington D, Buscher B, Fletcher R, Natusch DJD,  
1171 Vanak AT, Webb G (2019) The fatal flaws of compassionate conservation. *Conservation Biology*  
1172 33: 784–787. <https://doi.org/10.1111/cobi.13329>
- 1173 Oxford English Dictionary anthropomorphism, n. Available from:  
1174 <https://www.oed.com/view/Entry/8449?redirectedFrom=empathy> (November 4, 2019a).
- 1175 Oxford English Dictionary consequentialism, n. Available from:  
1176 <http://www.oed.com.ezproxy.lib.monash.edu.au/view/Entry/39548?redirectedFrom=consequentia>  
1177 [list#eid8585927](https://www.oed.com/view/Entry/39548?redirectedFrom=consequentia#eid8585927).
- 1178 Oxford English Dictionary empathy, n. Available from:  
1179 <https://www.oed.com/view/Entry/61284?redirectedFrom=empathy> (November 4, 2019c).
- 1180 Oxford English Dictionary neoteny, n. Available from: [https://www-oed-](https://www.oed-com.uaccess.univie.ac.at/view/Entry/126078?redirectedFrom=neoteny#eid)  
1181 [com.uaccess.univie.ac.at/view/Entry/126078?redirectedFrom=neoteny#eid](https://www.oed-com.uaccess.univie.ac.at/view/Entry/126078?redirectedFrom=neoteny#eid).
- 1182 Palazy L, Bonenfant C, Gaillard J-M, Courchamp F (2011) Cat dilemma: too protected to escape trophy  
1183 hunting? *PLoS One* 6: e22424. <https://doi.org/10.1371/journal.pone.0022424>
- 1184 Palazy L, Bonenfant C, Gaillard JM, Courchamp F (2012) Rarity, trophy hunting and ungulates. *Animal*  
1185 *Conservation* 15: 4–11. <https://doi.org/10.1111/j.1469-1795.2011.00476.x>
- 1186 Palazy L, Bonenfant C, Gaillard J-M, Courchamp F (2013) On the use of the IUCN status for the  
1187 management of trophy hunting. *Wildlife research* 39: 711–720. <https://doi.org/10.1071/WR12121>
- 1188 Palmer C, McShane K, Sandler R (2014) Environmental ethics. *Annual Review of Environment and*  
1189 *Resources* 39: 419–442. <https://doi.org/10.1146/annurev-environ-121112-094434>
- 1190 Parker IM, Simberloff D, Lonsdale WM, Goodell K, Wonham M, Kareiva PM, Williamson MH, Von  
1191 Holle B, Moyle PB, Byers JE, Goldwasser L (1999) Impact: toward a framework for  
1192 understanding the ecological effects of invaders. *Biological Invasions* 1: 3–19.  
1193 <https://doi.org/10.1023/A:1010034312781>
- 1194 Peterson MN, Peterson MJ, Peterson TR (2005) Conservation and the myth of consensus. *Conservation*  
1195 *biology* 19: 762–767. <https://doi.org/10.1111/j.1523-1739.2005.00518.x>
- 1196 Proença VM, Pereira HM, Vicente L (2008) Organismal complexity is an indicator of species existence  
1197 value. *Frontiers in Ecology and the Environment* 6: 298–299. [https://doi.org/10.1890/1540-](https://doi.org/10.1890/1540-9295(2008)6[298:OCIAIO]2.0.CO;2)  
1198 [9295\(2008\)6\[298:OCIAIO\]2.0.CO;2](https://doi.org/10.1890/1540-9295(2008)6[298:OCIAIO]2.0.CO;2)

- 1199 Proulx G, Brook RK, Cattet M, Darimont C, Paquet PC (2016) Poisoning wolves with strychnine is  
1200 unacceptable in experimental studies and conservation programmes. *Environmental Conservation*  
1201 43: 1–2. <https://doi.org/10.1017/S0376892915000211>
- 1202 Ramp D, Bekoff M (2015) Compassion as a practical and evolved ethic for conservation. *BioScience* 65:  
1203 323–327. <https://doi.org/10.1093/biosci/biu223>
- 1204 Redpath SM, Young J, Evely A, Adams WM, Sutherland WJ, Whitehouse A, Amar A, Lambert RA,  
1205 Linnell JDC, Watt A (2013) Understanding and managing conservation conflicts. *Trends in*  
1206 *Ecology & Evolution* 28: 100–109. <https://doi.org/10.1016/j.tree.2012.08.021>
- 1207 Regan T (2004) *The case for animal rights*. Univ of California Press.
- 1208 Rikoon JS (2006) Wild horses and the political ecology of nature restoration in the Missouri Ozarks.  
1209 *Geoforum* 37: 200–211. <https://doi.org/10.1016/j.geoforum.2005.01.010>
- 1210 Rohwer Y, Marris E (2021) Ecosystem integrity is neither real nor valuable. *Conservation Science and*  
1211 *Practice* 3: e411. <https://doi.org/10.1111/csp2.411>
- 1212 Rolston III H (2003) *Environmental ethics*. In: Bunnin N, Tsui-James EP (Eds), *The Blackwell*  
1213 *Companion to Philosophy*, 2nd Edition. Blackwell Publishing, Oxford.
- 1214 Russell JC, Jones HP, Armstrong DP, Courchamp F, Kappes PJ, Seddon PJ, Opper S, Rauzon MJ, Cowan  
1215 PE, Rocamora G (2016) Importance of lethal control of invasive predators for island  
1216 conservation. *Conservation Biology* 30: 670–672. <https://doi.org/10.1111/cobi.12666>
- 1217 Salt HS (1894) *Animals' Rights: Considered in Relation to Social Progress*. New York, London,  
1218 Macmillan & Co., 200 pp.
- 1219 Sandler R (2012) Intrinsic Value, Ecology, and Conservation. *Nature Educational Knowledge* 3: 4.
- 1220 Schuchert P, Shuttleworth CM, McInnes CJ, Everest DJ, Rushton SP (2014) Landscape scale impacts of  
1221 culling upon a European grey squirrel population: can trapping reduce population size and  
1222 decrease the threat of squirrelpox virus infection for the native red squirrel? *Biological Invasions*  
1223 16: 2381–2391. <https://doi.org/10.1007/s10530-014-0671-8>
- 1224 Shao Y, Li M, Zhang W, Ji Y, Hayes DJ (2018) World's Largest Pork Producer in Crisis: China's African  
1225 Swine Fever Outbreak. *Agricultural Policy Review* 2018: 1.
- 1226 Shriver A (2006) Minding mammals. *Philosophical Psychology* 19: 433–442.  
1227 <https://doi.org/10.1080/09515080600726385>
- 1228 Singer P (1980) Utilitarianism and vegetarianism. *Philosophy & Public Affairs*: 325–337.  
1229 [https://doi.org/0048-3915/80/040325-13\\$00.65/I](https://doi.org/0048-3915/80/040325-13$00.65/I)
- 1230 Singer P (2009) Speciesism and moral status. *Metaphilosophy* 40: 567–581.  
1231 <https://doi.org/10.1111/j.1467-9973.2009.01608.x>
- 1232 Siurua H (2006) Nature above people: Rolston and “fortress” conservation in the south. *Ethics and the*  
1233 *Environment*: 71–96.

- 1234 Soulé ME (1985) What is conservation biology? *BioScience* 35: 727–734.  
1235 <https://doi.org/10.2307/1310054>
- 1236 Soulé ME (2014) The “New Conservation.” *Conservation Biology* 27: 895–897.  
1237 <https://doi.org/10.1111/cobi.12147>
- 1238 Stokes DL (2007) Things we like: human preferences among similar organisms and implications for  
1239 conservation. *Human Ecology* 35: 361–369. <https://doi.org/10.1007/s10745-006-9056-7>
- 1240 Talbert M (2019) Moral Responsibility. *The Stanford Encyclopedia of Philosophy*.
- 1241 Tam K-P, Lee S-L, Chao MM (2013) Saving Mr. Nature: Anthropomorphism enhances connectedness to  
1242 and protectiveness toward nature. *Journal of Experimental Social Psychology* 49: 514–521.  
1243 <https://doi.org/10.1016/j.jesp.2013.02.001>
- 1244 Taylor PW (1987) Inherent value and moral rights. *The Monist* 70: 15–30.  
1245 <https://doi.org/10.5840/monist198770113>
- 1246 Taylor PW (2011) *Respect for nature: A theory of environmental ethics*. Princeton University Press.
- 1247 Twigg LE, Parker RW (2010) Is sodium fluoroacetate (1080) a humane poison? The influence of mode of  
1248 action, physiological effects, and target specificity. *Animal Welfare* 19: 249–263.
- 1249 UNEP CBD (2010) Strategic plan for biodiversity 2011–2020 and the Aichi targets. In: Report of the  
1250 Tenth Meeting of the Conference of the Parties to the Convention on Biological Diversity.
- 1251 Varner G (2008) Utilitarianism and the evolution of ecological ethics. *Science and Engineering Ethics* 14:  
1252 551–573. <https://doi.org/10.1007/s11948-008-9102-5>
- 1253 Varner G (2011) Environmental ethics, hunting, and the place of animals. In: *The Oxford handbook of*  
1254 *animal ethics*. <https://doi.org/10.1093/oxfordhb/9780195371963.013.0032>
- 1255 de Waal FBM (2011) What is an animal emotion? *Annals of the New York Academy of Sciences* 1224:  
1256 191–206. <https://doi.org/10.1111/j.1749-6632.2010.05912.x>
- 1257 Wallach AD, Bekoff M, Batavia C, Nelson MP, Ramp D (2018) Summoning compassion to address the  
1258 challenges of conservation. *Conservation biology* 32: 1255–1265.  
1259 <https://doi.org/10.1111/cobi.13126>
- 1260 Wallach AD, Batavia C, Bekoff M, Alexander S, Baker L, Ben-Ami D, Boronyak L, Cardilin APA,  
1261 Carmel Y, Celermajer D, Coghlan S, Dahdal Y, Gomez JJ, Kaplan G, Keynan O, Khalilieh A,  
1262 Kopnina H, Lynn WS, Narayanan SR, Santiago Ávila FJ, Yanco E, Zemanova MA, Ramp D  
1263 (2020) Recognizing animal personhood in compassionate conservation. *Conservation Biology* 34:  
1264 1097–1106. <https://doi.org/10.1111/cobi.13494>
- 1265 Warren MA (2000) *Issues in Biomedical Ethics Moral Status: Obligations to Persons and Other Living*  
1266 *Things*. Oxford University Press, Oxford, 274 pp.  
1267 <https://doi.org/10.1093/acprof:oso/9780198250401.001.0001>
- 1268 Waytz A, Iyer R, Young L, Haidt J, Graham J (2019) Ideological differences in the expanse of the moral  
1269 circle. *Nature Communications* 10: 1–12. <https://doi.org/10.1038/s41467-019-12227-0>

- 1270 Weitz N, Carlsen H, Nilsson M, Skånberg K (2018) Towards systemic and contextual priority setting for  
1271 implementing the 2030 Agenda. *Sustainability Science* 13: 531–548.  
1272 <https://doi.org/10.1007/s11625-017-0470-0>
- 1273 Wilson GR, Edwards M (2019) Professional kangaroo population control leads to better animal welfare,  
1274 conservation outcomes and avoids waste. *Australian Zoologist* 40: 181–202.  
1275 <https://doi.org/10.7882/AZ.2018.043>
- 1276 Wittmer H, Rauschmayer F, Klauer B (2006) How to select instruments for the resolution of  
1277 environmental conflicts? *Land use policy* 23: 1–9.  
1278 <https://doi.org/10.1016/j.landusepol.2004.09.003>
- 1279

1280 **Tables**

1281

1282 **Table1.** Glossary of terms as they are used for the purposes of this paper.

| <b>Term</b>                   | <b>Definition</b>                                                                                                                                                                                                                                                                                                                                                                                                                                                  |
|-------------------------------|--------------------------------------------------------------------------------------------------------------------------------------------------------------------------------------------------------------------------------------------------------------------------------------------------------------------------------------------------------------------------------------------------------------------------------------------------------------------|
| Anthropocentrism<br>(strong)  | Value system that considers humans to be the sole, or primary, holder of moral standing, and therefore the concern of direct moral obligations. Non-human species are considered only to the extent that they affect the satisfaction of felt preference of human individuals (Norton 1984, Rolston 2003, Palmer et al. 2014).                                                                                                                                     |
| Anthropocentrism<br>(weak)    | Value theory in which all values are "explained by reference to satisfaction of some felt preference of a human individual or by reference to its bearing upon the ideals which exist as elements in a world view essential to determinations of considered preferences" (Norton 1984). That is, the value of an individual or species is not only exploitative, but incorporates human experience and the non-utilitarian relationship between humans and nature. |
| Anthropomorphism              | “The attribution of human personality or characteristics to something non-human, like an animal, object, etc.” (Oxford English Dictionary n.d.).                                                                                                                                                                                                                                                                                                                   |
| Biocentrism                   | Value system considering all living beings as the concern of direct moral obligations (Rolston 2003, Palmer et al. 2014).                                                                                                                                                                                                                                                                                                                                          |
| Collectivism                  | Value system in which a group or collective has a higher value than the individuals that compose it (Wallach et al. 2018).                                                                                                                                                                                                                                                                                                                                         |
| Compassionate<br>conservation | Conservation approach inspired by virtue ethics based on four tenets: i) do no harm; ii) individuals matter; iii) inclusivity (the value of an individual is independent from the context of the population, e.g. nativity, rarity, etc.); and iv) peaceful coexistence (Ramp and Bekoff 2015, Wallach et al. 2018).                                                                                                                                               |
| Community of<br>moral agents  | The group of beings considered to have moral responsibility in their actions (Talbert 2019). We consider it here to be restricted to humans.                                                                                                                                                                                                                                                                                                                       |

|                                                  |                                                                                                                                                                                                                                                                                                                                                   |
|--------------------------------------------------|---------------------------------------------------------------------------------------------------------------------------------------------------------------------------------------------------------------------------------------------------------------------------------------------------------------------------------------------------|
| Community of moral patients                      | The group of beings considered to have intrinsic moral value, and towards which moral agents have moral obligations (Warren 2000). The size of the group (referred to as the moral community in this work, for simplification) depends on the value system. For example, the moral community is restricted to humans in case of Anthropocentrism. |
| Conservation welfare                             | Conservation approach aiming at minimizing animal suffering (Beausoleil et al. 2018).                                                                                                                                                                                                                                                             |
| Consequentialism                                 | “An ethical doctrine which holds that the morality of an action is to be judged solely by its consequences” (Oxford English Dictionary n.d.).                                                                                                                                                                                                     |
| Convergence hypothesis                           | “If the interests of the human species interpenetrate those of the living Earth, then it follows that anthropocentric and non-anthropocentric policies will converge in the indefinite future” (Norton 1986).                                                                                                                                     |
| Deontology                                       | A normative ethical theory considering that “choices are morally required, forbidden, or permitted” (Alexander and Moore 2016).                                                                                                                                                                                                                   |
| Ecocentrism                                      | Value system considering that species, their assemblages and their functions, as well as more broadly ecosystems, rather than individuals, are the concern of direct moral obligations (Rolston 2003, Palmer et al. 2014).                                                                                                                        |
| Empathy                                          | “The quality or power of projecting one's personality into or mentally identifying oneself with an object of contemplation, and so fully understanding or appreciating it.” (Oxford English Dictionary n.d.). Empathy will influence the inherent value given to individuals from other species.                                                  |
| Impact (for the purposes of the framework, Eq.1) | Impact refers to any effect that modifies the wellbeing, health or resilience (for non-sentient beings) of an individual, from physical pain to emotional suffering and death (these notions being interrelated, but not equivalent).                                                                                                             |
| Inherent value (our definition)                  | Value possessed by an individual or collective, accounting for their intrinsic value (see definition below) and the effects of multiple context-dependent factors (e.g. charisma, anthropomorphism, organismic complexity, neoteny, cultural importance, religion, or parochialism). For                                                          |



|                        |                                                                                                                                                                                                                                                                                                                                                                                                                      |
|------------------------|----------------------------------------------------------------------------------------------------------------------------------------------------------------------------------------------------------------------------------------------------------------------------------------------------------------------------------------------------------------------------------------------------------------------|
|                        | <p>example, wolves and dogs may be considered to have similar intrinsic value under sentientism because they have similar cognitive abilities, but may be valued differently by people who own dogs as pets (i.e. due to parochialism).</p>                                                                                                                                                                          |
| Intrinsic value        | <p>Value possessed by an individual or collective as defined by a system of moral valuation, such as anthropocentrism, sentientism, biocentrism or ecocentrism. Once a criteria has been selected in accordance with the system of values (e.g. cognitive ability under sentientism, the choice of a criteria itself may be subjective), intrinsic value is determined by this criteria and context-independent.</p> |
| Invasive alien species | <p>“Plants, animals, pathogens and other organisms that are non-native to an ecosystem, and which may cause economic or environmental harm or adversely affect human health” (<i>Regulation (EU) No 1143/2014 of the European Parliament and of the Council of 22 October 2014 on the prevention and management of the introduction and spread of invasive alien species</i>).</p>                                   |
| Moral community        | <p>See “Community of moral patients”.</p>                                                                                                                                                                                                                                                                                                                                                                            |
| Moral dilemma          | <p>Situation in which a moral agent regards themselves as having moral reasons to do different, incompatible actions (McConnell 2018).</p>                                                                                                                                                                                                                                                                           |
| Nativism               | <p>Value system considering that species that have evolved in a given location have a higher value in this location than species that have evolved somewhere else. In nativism, value varies spatially (Wallach et al. 2018).</p>                                                                                                                                                                                    |
| Nature despite people  | <p>Management conceptual approach aiming at conserving biological diversity (focusing on species and habitats) specifically in response to human impacts on the environment, e.g. sustainable use (Mace 2014).</p>                                                                                                                                                                                                   |
| Nature for itself      | <p>Management conceptual approach aiming at conserving biological diversity (focusing on wilderness and natural habitats) through human exclusion, for example through the creation of parks and protected areas (Mace 2014).</p>                                                                                                                                                                                    |
| Nature for people      | <p>Management conceptual approach aiming at conserving the components</p>                                                                                                                                                                                                                                                                                                                                            |

|                     |                                                                                                                                                                                                                                                                                               |
|---------------------|-----------------------------------------------------------------------------------------------------------------------------------------------------------------------------------------------------------------------------------------------------------------------------------------------|
|                     | of nature beneficial to humans (focusing on ecosystems and their services) (Mace 2014).                                                                                                                                                                                                       |
| Neoteny             | “The retention of juvenile characteristics in a (sexually) mature organism” (Oxford English Dictionary n.d.).                                                                                                                                                                                 |
| New conservation    | Discipline aiming at preserving biological diversity through the conservation of natural elements providing services and contribution to human wellbeing (Kareiva and Marvier 2012, Kareiva 2014).                                                                                            |
| Normative postulate | Value statements that make up the basis of an ethic of appropriate attitudes toward other forms of life (Soulé 1985).                                                                                                                                                                         |
| Parochialism        | Ideology in which moral regard is directed “towards socially closer and structurally tighter targets, relative to socially more distant and structurally looser targets”, and, by extension, to species phylogenetically, cognitively, or in appearance closer to humans (Waytz et al. 2019). |
| People and nature   | Management conceptual approach considering that humans and nature are interdependent and therefore aiming at achieving compromises in the conservation of nature and human wellbeing (Mace 2014).                                                                                             |
| Relational value    | “Preferences, principles, and virtues associated with relationships, both interpersonal and as articulated by policies and social norms [...] Relational values are not present in things but derivative of relationships and responsibilities to them.” (Chan et al. 2016).                  |
| Sentience           | The ability to experience phenomenal consciousness, i.e. the qualitative, subjective, experiential, or phenomenological aspects of conscious experience, rather than just the experience of pain and pleasure (Allen and Trestman 2017).                                                      |
| Sentientism         | Value system considering sentient beings as the concern of direct moral obligations (Rolston 2003, Palmer et al. 2014).                                                                                                                                                                       |
| Speciesism          | Value system in which some species are considered to have a higher value than others, for various possible reasons (Singer 2009). Speciesism is often used to refer to the superiority of humans, which is a specific expression of speciesism as considered in this paper.                   |

|                          |                                                                                                                                                                                                                                                                                                                                                 |
|--------------------------|-------------------------------------------------------------------------------------------------------------------------------------------------------------------------------------------------------------------------------------------------------------------------------------------------------------------------------------------------|
| Suffering                | Negative emotion, sometimes called emotional distress, experienced by sentient beings, and which can result from different causes, including but not limited to physical pain (Dawkins 2008, Farah 2008).                                                                                                                                       |
| Traditional conservation | Discipline aiming at preserving biological diversity through the management of nature, and based on four value-driven normative postulates: “diversity of organisms is good,” “ecological complexity is good,” “evolution is good,” and “biotic diversity has intrinsic value” (Soulé 1985). Traditional conservation is rooted in ecocentrism. |
| Utilitarian value        | Value given to an individual or collective by humans, based on its utility.                                                                                                                                                                                                                                                                     |
| Virtue ethics            | Ethical doctrine that emphasizes the virtues, or moral character as the reason for action (Hursthouse and Pettigrove 2018).                                                                                                                                                                                                                     |

---

1283 **Table 2.** Set of questions to ask in order to evaluate Equation 1 and related concepts. The  
 1284 purpose is to guide users in exploring all the elements to consider when assessing the  
 1285 consequences of management actions rather than necessarily attempting a quantification of each.  
 1286 See Table 3 for factors to consider to answer these questions.

1287

| Element of Equation 1 | Question                                                                     | Mathematical formulation                                | Examples of interpretation                                                                                                                                                                                                                                                                                                 |
|-----------------------|------------------------------------------------------------------------------|---------------------------------------------------------|----------------------------------------------------------------------------------------------------------------------------------------------------------------------------------------------------------------------------------------------------------------------------------------------------------------------------|
| $V_s$                 | What relative value do you place on individuals of different species?        | What is the distribution of $V_s$ ?                     | <ul style="list-style-type: none"> <li>- If a few species have a disproportionately high value compared to others, i.e. speciesism, the distribution of <math>V_s</math> is highly skewed.</li> <li>- If all species have a similar value, the distribution of <math>V_s</math> is even.</li> </ul>                        |
| $I_s$                 | What measure(s) of impact do you consider?                                   | What is the unit of $I_s$ ?<br>How to quantify $I_s$ ?  | <ul style="list-style-type: none"> <li>- If only individual survival matters, <math>I_s</math> can be quantified as the probability of death, and assessed through surveys.</li> <li>- If animal wellbeing matters, approaches based on physical aspect, stress, etc. can be used to quantify <math>I_s</math>.</li> </ul> |
| $a$                   | Do you value individuals or species?                                         | What is the value of $a$ ? Is $a$ positive or negative? | <ul style="list-style-type: none"> <li>- If individuals matter, <math>a &gt; 0</math>, otherwise <math>a \leq 0</math>.</li> <li>- If all individuals have the same value, <math>a = 1</math>. That means that common species will weigh more in the assessment of the conservation action.</li> </ul>                     |
|                       | If you value species, should rare species have more values than common ones? | How negative is $a$ ?                                   | <ul style="list-style-type: none"> <li>- If all species must weigh the same, <math>a = 0</math>.</li> <li>- If rare species should be given more importance, <math>a &lt; 0</math>.</li> </ul>                                                                                                                             |

1288

1289 **Table 3.** List of factors to consider regarding the effects of environmental management actions  
1290 from an environmental ethics perspective.

| <b>Factor</b>                              | <b>Influence on variables and outputs in Equations 1 to 5</b>                                                                                                                                                                                                                                                                                                                                  |
|--------------------------------------------|------------------------------------------------------------------------------------------------------------------------------------------------------------------------------------------------------------------------------------------------------------------------------------------------------------------------------------------------------------------------------------------------|
| Biotic interactions                        | The impact or suffering of individuals from one species can be caused by individuals from another species, either through direct or indirect interactions. Management actions can therefore also have non-trivial indirect impacts on some species.                                                                                                                                            |
| Capacity to provide ecosystem services     | The presence of a specific species may increase the fitness/welfare of other species through the ecosystem services it provides. Since these effects can be difficult to quantify explicitly, the value of such species may be increased in Equations 1 to 4 to account for them.                                                                                                              |
| Discounting rate                           | Rate at which impacts that occur in the future lose importance.                                                                                                                                                                                                                                                                                                                                |
| Impact quantification and commensurability | How the impacts of management actions are quantified is also dependent on value systems, as some impacts (such as death) may be considered incommensurable to others (such as suffering).                                                                                                                                                                                                      |
| Responsibility from previous actions       | Previous human actions on certain species, such as reintroduction of domesticated species or the introduction of alien species can change the perception of the public and therefore change the inherent value attributed to these species, or change the morality of an action, in addition to obviously having an impact on these species.                                                   |
| Spatial scale                              | The spatial scale will change the abundance $N$ and the number of species considered. As a result, a management action that is more beneficial than another at small scale may not be such at a larger scale, and reciprocally. Additionally, the spatial scale can change the inherent value of species, for example under nativism, or because of the range of cultures that are considered. |
| Temporal scale                             | The time frame over which the impact or the suffering of individuals is computed can change their values. Management actions may decrease welfare of individuals on the short term, but                                                                                                                                                                                                        |

---

be beneficial on the long term once the ecosystem has stabilised. Similarly, not culling some population may cause less suffering on the short term, but increase it in the future by disrupting ecosystem services, leading to population collapse due to lack of resources, etc.

---

|                       |                                                                                                                                                                                                                                                                                                               |
|-----------------------|---------------------------------------------------------------------------------------------------------------------------------------------------------------------------------------------------------------------------------------------------------------------------------------------------------------|
| Uncertainty of impact | The complexity of an ecological system can make the impact of management actions on different species difficult to assess precisely, therefore creating potential errors, especially in the presence of multiple biotic interactions. This may lead to an incorrect estimation of the consequences <i>C</i> . |
|-----------------------|---------------------------------------------------------------------------------------------------------------------------------------------------------------------------------------------------------------------------------------------------------------------------------------------------------------|

---

|                                                  |                                                                                                                                                                                                                                       |
|--------------------------------------------------|---------------------------------------------------------------------------------------------------------------------------------------------------------------------------------------------------------------------------------------|
| Uncertainty of value expressions and preferences | Quantifying the value given by a person or a group of people to an individual is difficult, context-dependent, and highly subjective. Sensitivity analyses on the distribution of values can be used to account for such uncertainty. |
|--------------------------------------------------|---------------------------------------------------------------------------------------------------------------------------------------------------------------------------------------------------------------------------------------|

---

1292

## Figure

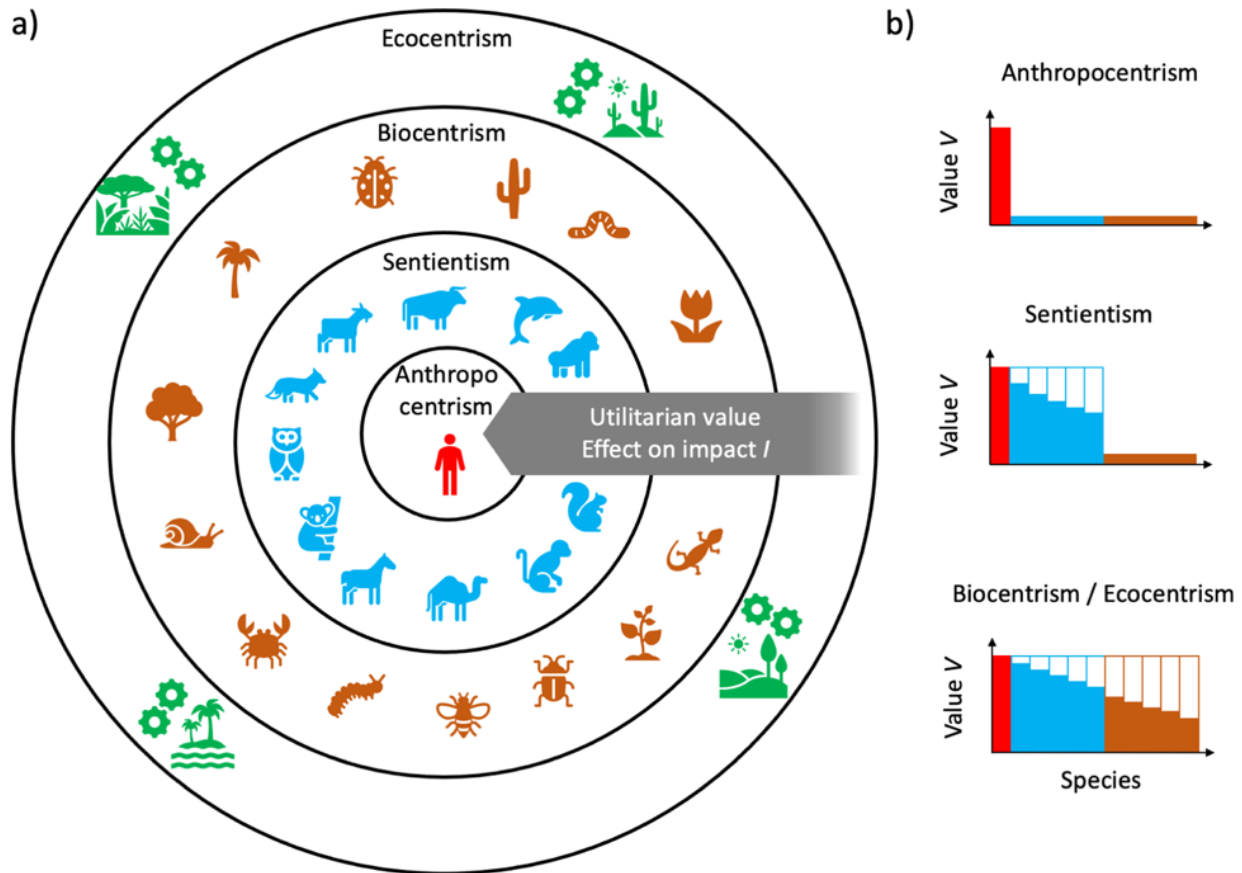

1293

1294

1295

1296

1297

1298

1299

1300

1301

1302

1303

1304

1305

1306

1307

**Figure 1.** Differences between the moral communities considered by value systems influenced by anthropocentrism, sentientism, biocentrism and ecocentrism (depicted by the nested circles and colours) and how values can differ between members of the different moral communities. a) Anthropocentrism, sentientism and biocentrism all value individuals intrinsically, but consider different moral communities, i.e. their values depend on the category of species they belong to, with  $\{\text{humans}\} \in \{\text{sentient beings}\} \in \{\text{all living organisms}\}$ . Species outside of the moral community may have a utilitarian value for species in the moral community (represented by the arrow), which will be reflected by changes in the impact variable. b) The intrinsic value, in combination with contextual factors, defines the inherent value  $V$  of an individual or species and the distribution of  $V$  will change depending on the set of species included in the moral community. Anthropocentrism, sentientism and biocentrism value individuals from different groups of species. Biocentrism and ecocentrism give value to the same group of species, i.e. all living organisms, but while biocentrism values individuals, ecocentrism values ecological collectives, i.e. species or species assemblages and ecosystems. Note that species can have both



1308 an inherent and a utilitarian value. Within the moral community, species may have equal inherent  
1309 values, but subjective perceptions and different value systems may also assign different values to  
1310 different species. The skewness of the value distribution then indicates the degree or strength of  
1311 speciesism with respect to the species of reference, assumed here to be the human species, and is  
1312 influenced by many factors, including charisma, cultural context, etc.

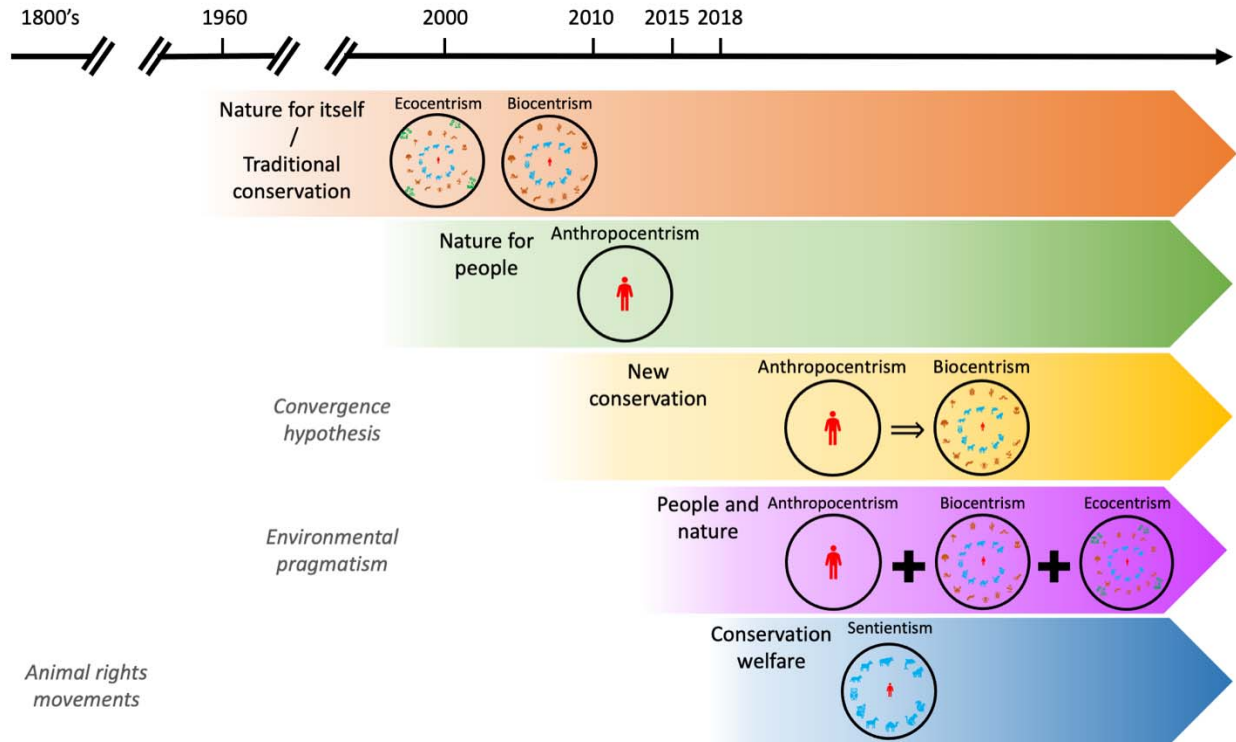

1313

1314

1315

1316

1317

1318

1319

1320

1321

1322

**Figure 2.** Different value systems (or combination of) correspond to different conservation perspectives, which were introduced at different points in time (the timeline is approximate for illustrative purpose; see also Mace 2014). A nature for itself perspective can be either ecocentric, biocentric, or both. Under new conservation, an anthropocentric perspective is considered necessary to achieve a desirable outcome under a biocentric perspective ( $\Rightarrow$ ). Under the people and nature approach, anthropocentric, biocentric and ecocentric perspectives are considered simultaneously (+). Underlying concepts and movements pre-dating conservation approaches are indicated in grey italic at the approximate period they originated.

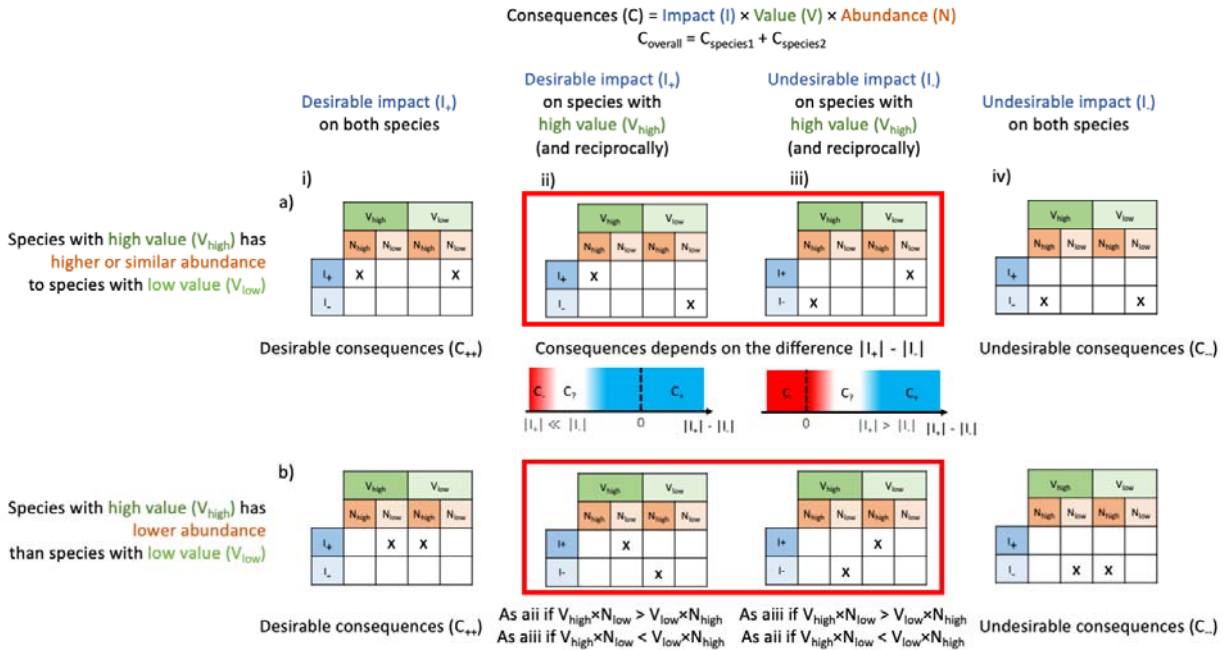

1323

1324

1325

1326

1327

1328

1329

1330

1331

1332

1333

1334

1335

1336

1337

1338

1339

1340

1341

1342

**Figure 3.** Applying the framework presented in Equation 1 to determine the likely consequence of a management action on a system with two species, highlighting possible moral dilemmas in red. In the case shown *a* is set to 1 for simplicity, but the two species have different inherent values  $V_{\text{high}}$  and  $V_{\text{low}}$  (i.e. how individuals are valued does not vary with abundance, but individuals of one species are valued more than the other species). The likely consequence changes with the relative abundance of the two species [top row (a) vs. bottom row (b)] and with whether the impact of the management intervention is positive ( $I_+$ ) or negative ( $I_-$ ) on the respective species [columns (i-iv)]. a) The species with high value has higher or similar abundance to the species with low value. If the impacts  $I_+$  and  $I_-$  have similar orders of magnitudes or  $|I_+| > |I_-|$ , aii generates positive consequences ( $C_+$ ) because  $V_{\text{high}} \times N_{\text{high}} > V_{\text{low}} \times N_{\text{low}}$ . Similarly, if the impacts  $I_+$  and  $I_-$  have similar orders of magnitudes or  $|I_+| < |I_-|$ , aiii generates negative consequences ( $C_-$ ). If  $|I_+| \ll |I_-|$  or  $|I_+| > |I_-|$  (for aii and aiii, respectively), the difference of impact can counter-balance  $V_{\text{high}} \times N_{\text{high}} > V_{\text{low}} \times N_{\text{low}}$ , making desirable consequences undesirable and vice versa. However, the difference of magnitude between  $I_+$  and  $I_-$  at which this switch occurs is difficult to determine due to the different units of  $V$ ,  $N$ , and  $I$ . This uncertainty corresponds to a moral dilemma due to a conflict between the desire to have a small positive impact for the species with the larger value and abundance, and the desire to avoid a very negative impact for the species with the lower value and abundance for aii. For aiii, the dilemma is due to a conflict between the desire to avoid a small negative impact for the species

1343 with the higher value and abundance, and the desire to have a very positive impact for the  
1344 species with the lower value and abundance. b) The species with higher value  $V_{\text{high}}$  has the lower  
1345 abundance  $N_{\text{low}}$ . If impacts are different between the two species, the opposition between  $V$  and  
1346  $N$  will most likely generate moral dilemmas (C<sub>7</sub>). If  $V_{\text{high}} \times N_{\text{low}} > V_{\text{low}} \times N_{\text{high}}$ , bii is equivalent  
1347 to aii, and to aiii otherwise (and biii is equivalent to aiii, and to aii otherwise), but because value  
1348 and abundance have different units, it is difficult to determine for which value and abundance  
1349  $V_{\text{high}} \times N_{\text{low}} = V_{\text{low}} \times N_{\text{high}}$ . Therefore, an additional moral dilemma arises due to a conflict  
1350 between the desire to avoid a negative impact for the larger population and the desire to avoid a  
1351 negative impact for the species with the higher value.
